# Supplementary material for: Oxidative transformation of cyclic ethers/amines to lactones/lactams using a DIB/TBHP protocol
Source: Royal Society of Chemistry journal article supplement (doi:10.1039/c3ra44184a), 2013-01-01

## Electronic Supplementary Information

# Oxidative Transformation of Cyclic Ethers/Amines to Lactones/Lactams Using DIB/TBHP Protocol

Yi Zhao, Jascelyn Qian Lin Ang, Angela Wan Ting Ng, Ying-  
Yeung Yeung\*

*Department of Chemistry, National University of Singapore, 3 Science Drive 3, Singapore  
117543*

*Fax: (+)65-65162658; E-mail: chmyyy@nus.edu.sg*

### Table of Contents

|                |                                                     |
|----------------|-----------------------------------------------------|
| <b>S2-S12</b>  | <b>Experimental Procedures and Physical Data</b>    |
| <b>S13-S49</b> | <b><sup>1</sup>H and <sup>13</sup>C NMR Spectra</b> |

## (A) Materials and Methods

Infrared spectra were recorded on a BIO-RAD FTS 165 FT-IR spectrophotometer and reported in wave numbers ( $\text{cm}^{-1}$ ).  $^1\text{H}$  NMR and  $^{13}\text{C}$  NMR spectra were obtained in  $\text{CDCl}_3$  solutions with a Bruker DPX 500 spectrophotometer at 500 MHz and 125 MHz, respectively. NMR spectra are referenced to residual chloroform ( $\delta$  7.26 ppm, 1H;  $\delta$  77.0 ppm, 13 C). Chemical shifts are reported in ppm ( $\delta$ ); multiplicities are indicated by s (singlet), d (doublet), t (triplet), q (quartet), quin (quintet) and m (multiplet). Coupling constants, J, are reported in Hertz. Low resolution mass spectra were obtained on a Finnigan/MAT LCQ spectrometer in ESI mode. High resolution mass spectra were obtained on a Finnigan/MAT 95XL-T spectrometer. Enantiomeric excesses were determined by HPLC analysis on Shimadzu HPLC units, including the following instruments: pump, LC-20AD; detector, SPD-20A; column, Daicel Chiralpak IB. Thin-layer chromatography (TLC) was performed on Merck aluminum-precoated plates of silica gel 60 F<sub>254</sub>. Visualization was obtained by spraying with basic potassium permanganate with subsequent heating. Column chromatography was performed with silica gel 60 (230-400) mesh. The *tert*-butyl hydroperoxide (TBHP) 5-6 M solution in decane was purchased from Aldrich Chemical Co. Commercially available reagents and solvents were used without further treatment.

**(B) DIB/TBHP oxidation of heterocycles**

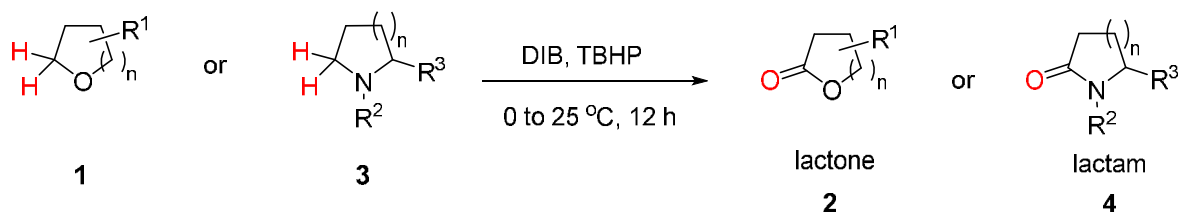

**Representative procedure for the oxidation of heterocycle:** To a solution of (tetrahydrofuran-2-yl)methyl acetate (**1a**) (72 mg, 0.50 mmol) in nitromethane (1 mL) was added diacetoxyiodobenzene (484 mg, 1.5 mmol) at 0 °C. The resultant suspension was vigorously stirred and a solution of *tert*-butylhydroperoxide (5.0 M in decane, 400  $\mu\text{L}$ , 2.0 mmol) was added dropwise over 30 min. After 12 hours, the reaction was quenched with  $\text{Na}_2\text{SO}_3$  (5 mL). The organic layer was separated and the aqueous layer was extracted with dichloromethane (4 x 5 mL). The combined extracts were dried ( $\text{MgSO}_4$ ), filtered, and concentrated *in vacuo*. The residue was purified by flash column chromatography eluted with *n*-hexanes/EtOAc (2:1) to yield (5-oxotetrahydrofuran-2-yl)methyl acetate (**2a**) as a yellow oil (51 mg, 65%).

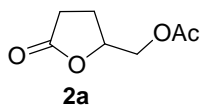

**(5-oxotetrahydrofuran-2-yl)methyl acetate (2a).**<sup>[3]</sup> Isolated as a yellow oil.  $^1\text{H NMR}$   $d$  4.76-4.71 (m, 1H), 4.32 (dd,  $J = 10.5, 3.0$  Hz, 1H), 4.15 (dd,  $J = 12.0, 5.6$  Hz, 1H), 2.64-2.52 (m, 2.0 H), 2.39-2.32 (m, 1H), 2.10 (s, 3H), 2.08-2.00 (m, 1H);  $^{13}\text{C NMR}$   $d$  176.4, 170.6, 77.2, 65.3, 29.7, 28.2, 23.9, 20.7; MS (ESI+)  $m/z$  (relative intensive) 198.8 ( $[\text{M}+\text{K}]^+$ , 100). (The data were in full accordance with the literature values).

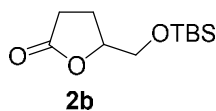

**5-[[*tert*-butyldimethylsilyloxy]methyl]dihydrofuran-2(3H)-one (2b).**<sup>[4]</sup> Isolated as a colourless oil. <sup>1</sup>H NMR *d* 4.61-4.54 (m, 1H), 3.86 (dd, *J* = 11.4, 3.0 Hz, 1H), 3.68 (dd, *J* = 14.2, 3.2 Hz, 1H), 2.64-2.55 (m, 1.0 H), 2.51-2.42 (m, 1H), 2.30-2.15 (m, 2.0 H), 0.89 (s, 9H), 0.06 (s, 6H); <sup>13</sup>C NMR *d* 177.6, 80.1, 64.9, 28.6, 25.8, 23.6, 18.3, -5.4, -5.5 ; MS (ESI+) *m/z* (relative intensive) 230.9 (M<sup>+</sup>). (The data were in full accordance with the literature values).

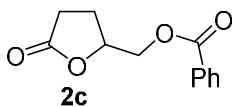

**(5-oxotetrahydrofuran-2-yl)methyl benzoate (2c).**<sup>[5]</sup> Isolated as a yellow oil. <sup>1</sup>H NMR *d* 8.03 (dd, *J* = 8.4, 1.4 Hz, 2H), 7.59 (t, *J* = 7.4 Hz, 1H), 7.46(t, *J* = 7.2 Hz, 2H), 4.92-4.84 (m, 1H), 4.55 (dd, *J* = 12.3, 3.2 Hz, 1H), 4.45 (dd, *J* = 12.2, 5.4 Hz, 1H), 2.67-2.59 (m, 2H), 2.49-2.37 (m, 1H), 2.20-2.07 (m, 1H); <sup>13</sup>C NMR *d* 176.5, 166.2, 133.5, 129.7, 129.3, 128.6, 77.4, 65.7, 28.2, 24.0; MS (ESI+) *m/z* (relative intensive) 243.0 ([M+Na]<sup>+</sup>, 100). (The data were in full accordance with the literature values).

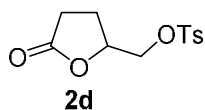

**(5-oxotetrahydrofuran-2-yl)methyl 4-methylbenzenesulfonate (2d).**<sup>[6]</sup> Isolated as a yellow oil. <sup>1</sup>H NMR *d* 7.78 (d, *J* = 8.4 Hz, 2H), 7.36 (d, *J* = 7.8 Hz, 2H), 4.72-4.65 (m, 1H), 4.19 (dd, *J* = 11.0, 3.3 Hz, 1H), 4.13 (dd, *J* = 11.0, 4.2 Hz, 1H), 2.59-2.50 (m, 2H), 2.46 (s, 3H), 2.41-2.28 (m, 1H), 2.18-2.06 (m, 1H); <sup>13</sup>C NMR *d* 175.9, 145.3, 132.2, 130.0, 127.9, 69.8, 29.6, 27.8, 23.5, 21.6; MS (ESI+) *m/z* (relative intensive) 563.7 (2[M+Na]<sup>+</sup>, 100). (The data were in full accordance with the literature values).

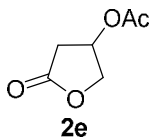

**(5-oxotetrahydrofuran-3-yl) acetate (2e).**<sup>[9]</sup> Isolated as a yellow oil. <sup>1</sup>H NMR *d* 5.44-5.41 (m, 1H), 4.50 (dd, *J* = 11.0, 4.3 Hz, 1H), 4.37 (d, *J* = 10.8 Hz, 1H), 2.85 (dd, *J* = 18.5, 6.8 Hz, 1H), 2.62 (d, *J* = 18.3 Hz, 1H), 2.10 (s, 3H); <sup>13</sup>C NMR *d* 174.4, 170.3, 73.0, 69.7, 34.5, 20.8 ; MS (ESI+) *m/z* (relative intensive) 166.7 ([M+Na]<sup>+</sup>, 100). (The data were in full accordance with the literature values).

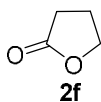

**dihydrofuran-2(3H)-one (2f).**<sup>[1]</sup> Isolated as a clear oil. <sup>1</sup>H NMR *d* 4.33 (t, *J* = 7.1 Hz, 2H), 2.47 (t, *J* = 7.6 Hz, 2H), 2.24 (quin, *J* = 7.2 Hz, 2H); <sup>13</sup>C NMR *d* 177.8, 68.5, 27.7, 22.1; MS (ESI+) *m/z* (relative intensive) 108.9 ([M+Na]<sup>+</sup>, 100). (The data were in full accordance with the authentic sample).

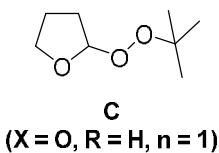

**2-(tert-butylperoxy)tetrahydrofuran (C; X = O, R = H, n = 1).**<sup>[2]</sup> Isolated as a yellow oil. <sup>1</sup>H NMR *d* 5.56 (dd, *J* = 6.0, 1.8 Hz, 1H), 3.93 (t, *J* = 6.2 Hz, 2H), 2.05-1.92 (m, 2H), 1.89-1.73 (m, 2H), 1.25 (s, 9H); <sup>13</sup>C NMR *d* 106.6, 80.5, 67.4, 29.3, 26.4, 24.0; MS (ESI+) *m/z* (relative intensive) 182.8 ([M+Na]<sup>+</sup>, 100). (The data were in full accordance with the literature values)

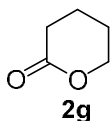

**Tetrahydro-2H-pyran-2-one (2g).**<sup>[11]</sup> Isolated as a yellow oil. <sup>1</sup>H NMR *d* 4.34 (t, J = 6.7 Hz, 2H), 2.58 (t, J = 7.0 Hz, 2H), 1.95-1.85 (m, 4H); <sup>13</sup>C NMR *d* 171.4, 69.4, 29.8, 22.3, 19.1 ; MS (ESI+) *m/z* (relative intensive) 123.0 ([M+Na]<sup>+</sup>, 100). (The data were in full accordance with the literature values).

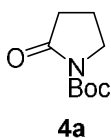

**tert-butyl 2-oxopyrrolidine-1-carboxylate (4a).**<sup>[11]</sup> Isolated as a yellow oil. <sup>1</sup>H NMR *d* 3.72 (t, J = 7.2 Hz, 2H), 2.49 (t, J = 7.9 Hz, 2H), 1.97 (quin, J = 8.1 Hz, 2H), 1.50 (s, 9H) ; <sup>13</sup>C NMR *d* 174.3, 150, 82.7, 46.4, 32.9, 27.9, 17.3; MS (ESI+) *m/z* (relative intensive) 207.9 ([M+Na]<sup>+</sup>, 100). (The data were in full accordance with the literature values).

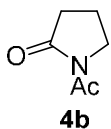

**1-acetylpyrrolidin-2-one (4b).**<sup>[12]</sup> Isolated as a yellow oil. <sup>1</sup>H NMR *d* 3.80 (t, J = 7.4 Hz, 2H), 2.59 (t, J = 8.0 Hz, 2H), 2.49 (s, 3H), 2.03 (quin, J = 8.1 Hz, 2H); <sup>13</sup>C NMR *d* 175.5, 171.3, 45.2, 33.5, 24.8, 17.1; MS (ESI+) *m/z* (relative intensive) 150.1 ([M+Na]<sup>+</sup>, 100). (The data were in full accordance with the literature values).

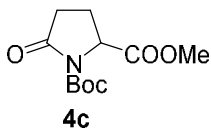

**1-tert-butyl 2-methyl 5-oxopyrrolidine-1,2-dicarboxylate (4c).**<sup>[13]</sup> Isolated as a yellow oil. <sup>1</sup>H NMR *d* 4.61 (dd, J = 9.4, 2.9 Hz, 1H), 3.78 (s, 3H), 2.66-2.57 (m, 1H), 2.54-2.44 (m, 1H), 2.35-2.28 (m, 1H), 2.08-1.99 (m, 1H), 1.49 (s, 9H); <sup>13</sup>C NMR *d* 173.3, 171.8, 149.2, 83.6, 58.8, 52.5, 31.2, 27.8, 21.4; MS

(ESI+)  $m/z$  (relative intensive) 265.9 ( $[M+Na]^+$ , 100). (The data were in full accordance with the literature values).

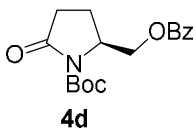

**tert-butyl 2-((benzoyloxy)methyl)-5-oxopyrrolidine-1-carboxylate (4d).** Isolated as a yellow oil.  $^1\text{H}$  NMR  $d$  8.00 (d,  $J = 8.0$  Hz, 2H), 7.58 (t,  $J = 7.5$  Hz, 1H), 7.45 (t,  $J = 8.0$  Hz, 2H), 4.57-4.50 (m, 3H), 2.76-2.69 (m, 1H), 2.52-2.47 (m, 1H), 2.28-2.23 (m, 1H), 2.06-2.01 (m, 1H), 1.54 (s, 9H);  $^{13}\text{C}$  NMR  $d$  174.0, 166.3, 149.7, 133.4, 129.7, 129.4, 128.6, 83.5, 65.3, 56.3, 31.8, 28.0, 21.0; IR (solution): 3427, 2980, 1786, 1720, 1646, 1453, 1369, 1313, 1273, 1152, 713; HRMS (ESI+) calcd for  $\text{C}_{17}\text{H}_{21}\text{NO}_5$   $[M+Na]^+$ : 342.1321, found 342.1312.

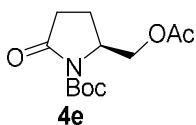

**tert-butyl 2-(acetoxymethyl)-5-oxopyrrolidine-1-carboxylate (4e).** Isolated as a colorless oil.  $^1\text{H}$  NMR  $d$  4.36 (dd,  $J = 12.9, 4.5$  Hz, 2H), 4.15 (dd,  $J = 13.3, 5.0$  Hz, 1H), 2.67-2.59 (m, 1H), 2.46-2.40 (m, 1H), 2.21-2.13 (m, 1H), 2.05 (s, 3H), 1.94-1.90 (m, 1H), 1.51 (s, 9H);  $^{13}\text{C}$  NMR  $d$  174.1, 170.6, 149.6, 83.4, 64.9, 56.1, 31.7, 28.0, 21.0, 20.8; IR (solution): 3427, 1784, 1744, 1645, 1457, 1369, 1310, 1255, 1153, 751; HRMS (ESI+) calcd for  $\text{C}_{12}\text{H}_{19}\text{NO}_5$   $[M+Na]^+$ : 280.1158, found 280.1155. HPLC (Daicel Chiralpak IB, *i*-PrOH/hexane = 25/75, 0.6 mL/min, 254 nm)  $t_1 = 14.6$  min (minor),  $t_2 = 16.0$  min (major).

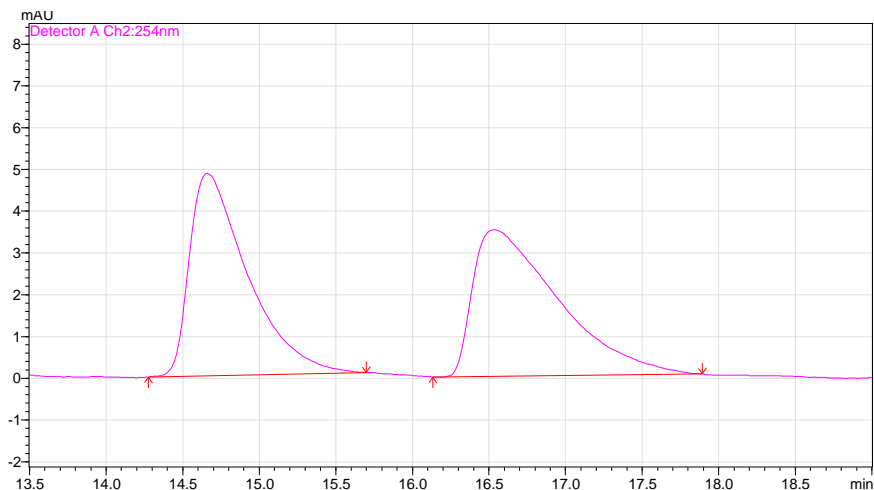

Detector A Ch2 254nm

| Peak#        | Ret. Time | Area          | Height      | Area %         | Height %       |
|--------------|-----------|---------------|-------------|----------------|----------------|
| 1            | 14.655    | 127745        | 4847        | 48.549         | 57.999         |
| 2            | 16.529    | 135382        | 3510        | 51.451         | 42.001         |
| <b>Total</b> |           | <b>263127</b> | <b>8356</b> | <b>100.000</b> | <b>100.000</b> |

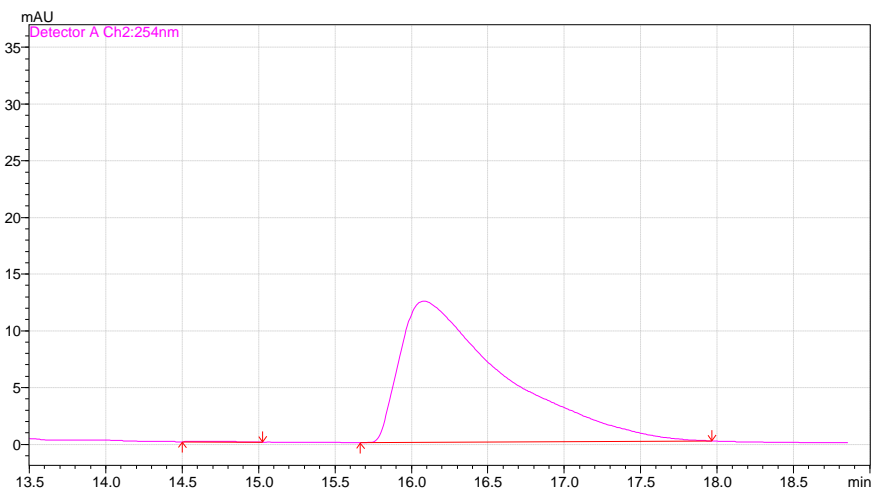

Detector A Ch2 254nm

| Peak#        | Ret. Time | Area          | Height       | Area %         | Height %       |
|--------------|-----------|---------------|--------------|----------------|----------------|
| 1            | 14.661    | 591           | 27           | 0.101          | 0.214          |
| 2            | 16.076    | 586121        | 12439        | 99.899         | 99.786         |
| <b>Total</b> |           | <b>586712</b> | <b>12466</b> | <b>100.000</b> | <b>100.000</b> |



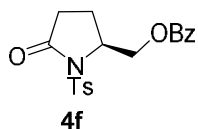

**(5-oxo-1-tosylpyrrolidin-2-yl)methyl benzoate (4f).** Isolated as a yellow oil.  $^1\text{H}$  NMR  $\delta$  7.95 (d,  $J = 8.0$  Hz, 2H), 7.68 (d,  $J = 8.3$  Hz, 2H), 7.54 (t,  $J = 7.5$  Hz, 1H), 7.36 (t,  $J = 8.0$  Hz, 2H), 7.17 (d,  $J = 8.3$  Hz, 2H), 4.78-4.75 (m, 1H), 4.71 (dd,  $J = 11.9, 4.0$  Hz, 1H), 4.50 (dd,  $J = 12.0, 1.75$  Hz, 1H), 2.63 (dt,  $J = 17.8, 10.8$  Hz, 1H), 2.49-2.34 (m, 2H), 2.22 (s, 3H), 2.07-2.03 (m, 1H);  $^{13}\text{C}$  NMR  $\delta$  173.6, 165.9, 145.2, 135.4, 133.3, 129.5, 129.4, 129.1, 128.4, 128.2, 65.8, 57.9, 31.2, 22.8, 21.5; IR (solution): 3447, 3023, 2926, 2855, 1725, 1601, 1453, 1362, 1272, 1216, 1171, 1119, 712; HRMS (ESI+) calcd for  $\text{C}_{19}\text{H}_{19}\text{NO}_5$   $[\text{M}+\text{Na}]^+$ : 396.0881, found 396.0876.

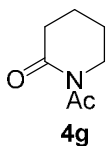

**1-acetypiperidine-2-one (4g).**<sup>[14]</sup> Isolated as a yellow oil.  $^1\text{H}$  NMR  $\delta$  3.74-3.69 (m, 2H), 2.55 (m, 2H), 2.52 (s, 3H), 1.84-1.81 (m, 4H);  $^{13}\text{C}$  NMR  $\delta$  173.8, 173.4, 43.8, 34.8, 27.7, 22.4, 20.3; MS (ESI+)  $m/z$  (relative intensive) 163.8 ( $[\text{M}+\text{Na}]^+$ , 100). (The data were in full accordance with the literature values).

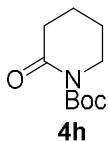

**tert-butyl 2-oxopiperidine-1-carboxylate (4h).**<sup>[14]</sup> Isolated as a yellow oil.  $^1\text{H}$  NMR  $\delta$  3.63-3.59 (m, 2H), 2.49-2.45 (m, 2H), 1.81-1.77 (m, 4H), 1.48 (s, 9H);  $^{13}\text{C}$  NMR  $\delta$  171.4, 152.6, 82.8, 46.2, 34.7, 27.9, 22.7, 20.4; MS (ESI+)  $m/z$  (relative intensive) 221.9 ( $[\text{M}+\text{Na}]^+$ , 100). (The data were in full accordance with the literature values).

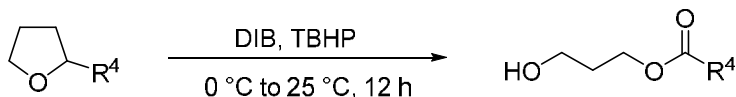

**Representative procedure for the oxidation of simple alkyl and aryl substituted THF:** To a solution of 2-methyltetrahydrofuran (**5**) (0.05 mL, 0.5 mmol) in *n*-butyl acetate (1 mL) was added diacetoxyiodobenzene (484 mg, 1.5 mmol) at 0 °C. The resultant suspension was vigorously stirred and a solution of *tert*-butylhydroperoxide (5.0 M in decane, 400  $\mu$ L, 2.0 mmol) was added dropwise over 30 min. After 12 hours, reaction was quenched with Na<sub>2</sub>SO<sub>3</sub> (5 mL). The organic layer was separated and the aqueous layer was extracted with dichloromethane (4 x 5 mL). The combined extracts were dried (MgSO<sub>4</sub>), filtered, and concentrated *in vacuo*. The residue was purified by flash column chromatography eluted with *n*-hexanes/EtOAc (3:1) to yield 3-hydroxypropyl acetate (**6**) as a yellow oil (43 mg, 72%).

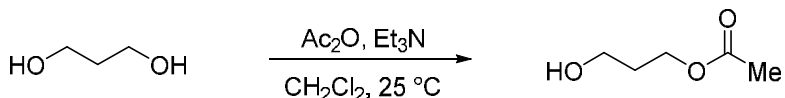

A sample of **6** was prepared by the reaction between propane-1,3-diol and acetic anhydride. The resulting product has an identical <sup>1</sup>H NMR as compound **6** synthesized from the oxidation.

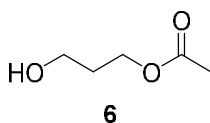

**3-hydroxypropyl acetate (6).**<sup>[15]</sup> Isolated as a yellow oil. <sup>1</sup>H NMR *d* 4.23 (t, *J* = 6.3 Hz, 2H), 3.70 (t, *J* = 6.3 Hz, 2H), 2.06 (s, 3H), 1.87 (quin, *J* = 6.3 Hz, 2H); <sup>13</sup>C NMR *d* 171.6, 61.5, 59.2, 31.7, 20.9; MS (ESI+) *m/z* (relative intensive) 118.8 (M<sup>+</sup>, 100). (The data were in full accordance with the literature values).

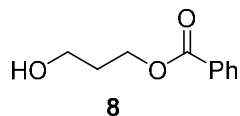

**3-hydroxypropyl benzoate (8).**<sup>[16]</sup> Isolated as a yellow oil. <sup>1</sup>H NMR *d* 8.04 (dd, *J* = 8.4, 1.5 Hz, 2H), 7.57 (tt, *J* = 7.5, 1.5 Hz, 1H), 7.45 (t, *J* = 6.9 Hz, 2H), 4.50 (t, *J* = 6.0 Hz, 2H), 3.70 (t, *J* = 6.0 Hz, 2H), 2.02 (quin, *J* = 6.0 Hz, 2H); <sup>13</sup>C NMR *d* 167.0, 133.0, 130.1, 129.6, 128.4, 61.8, 59.2, 31.9 ; MS (ESI +) *m/z* (relative intensive) 180.9 (*M*<sup>+</sup>, 100). (The data were in full accordance with the literature values).

### (C) References

- [1] Schwartz A., Garrell R., *Chem. Eur. J.* **2010**, *16*, 12718-12726.
- [2] Milind D. Nikalje, Sudalai A., *Tetrahedron* **1999**, *55*, 5903-5908.
- [3] Kang Y. B., Gade L.H., *J. Am. Chem. Soc.* **2003**, *133*, 3658-3667.
- [4] Gungarova G., Davydova A., Arkhipova A., Savvateeva E., Kirillova Y., Lyutik A., Yurkevi ch A., Shvets V., *Pharm. Chem. J.* **2006**, *40*, 320-324(5).
- [5] Cottrell I. F., Cowley A. R., Croft L. J., Hymns L., Moloney M. G., Nettleton E. J., Smithies H. K., Thompson A. L., *Tetrahedron* **2009**, *65*, 2537-2550.
- [6] Haynes S. W., Sydor P. K., Corre C., Song L., Challis G. L., *J. Am. Chem. Soc.* **2011**, *133*, 1793-1798.
- [7] Zhu M., Li L., Tong J., Zhang H., *Chin. Chem. Lett.* **2011**, *22*, 431-434.
- [8] Van Z., Zuidema G., Zack J., Kromann P., *J. Am. Chem. Soc.* **1953**, *75*, 5002-5006.
- [9] Park C., Lee J., Yoo K., Jung K., *Org. Lett.* **2010**, *12*, 2450-2452.
- [10] Adger B., Bes T., Grogan G., McCague R., Moreau S., Roberts S., Villa R., Wan P., Willetts A., *J. Chem. Soc., Chem. Commun.* **1995**, *15*, 1563-1564.
- [11] Dunsmore C., Fleming R., Turne N., *J. Am. Chem. Soc.* **2006**, *128*, 2224-2225.
- [12] Sasaki H., Mori Y., Nakamura J., Shibasaki J., *J. Med. Chem.* **1991**, *34*, 628-633.
- [13] Barraclough P., Dieterich P., Spray C. A., Young D. W., *Org. Biomol. Chem.* **2006**, *4*, 1483-1491
- [14] Thai K., Wang L., Dudding T., Bilodeau F., Gravel M., *Org. Lett.* **2010**, *12*, 5708-5711.
- [15] Mulvihill M., Miller M., *Tetrahedron* **1998**, *54*, 6605-6626.
- [16] Wakita N., Hara S., *Tetrahedron* **2010**, *66*, 7939-7945.

1H AMX500

jas-2-9-1

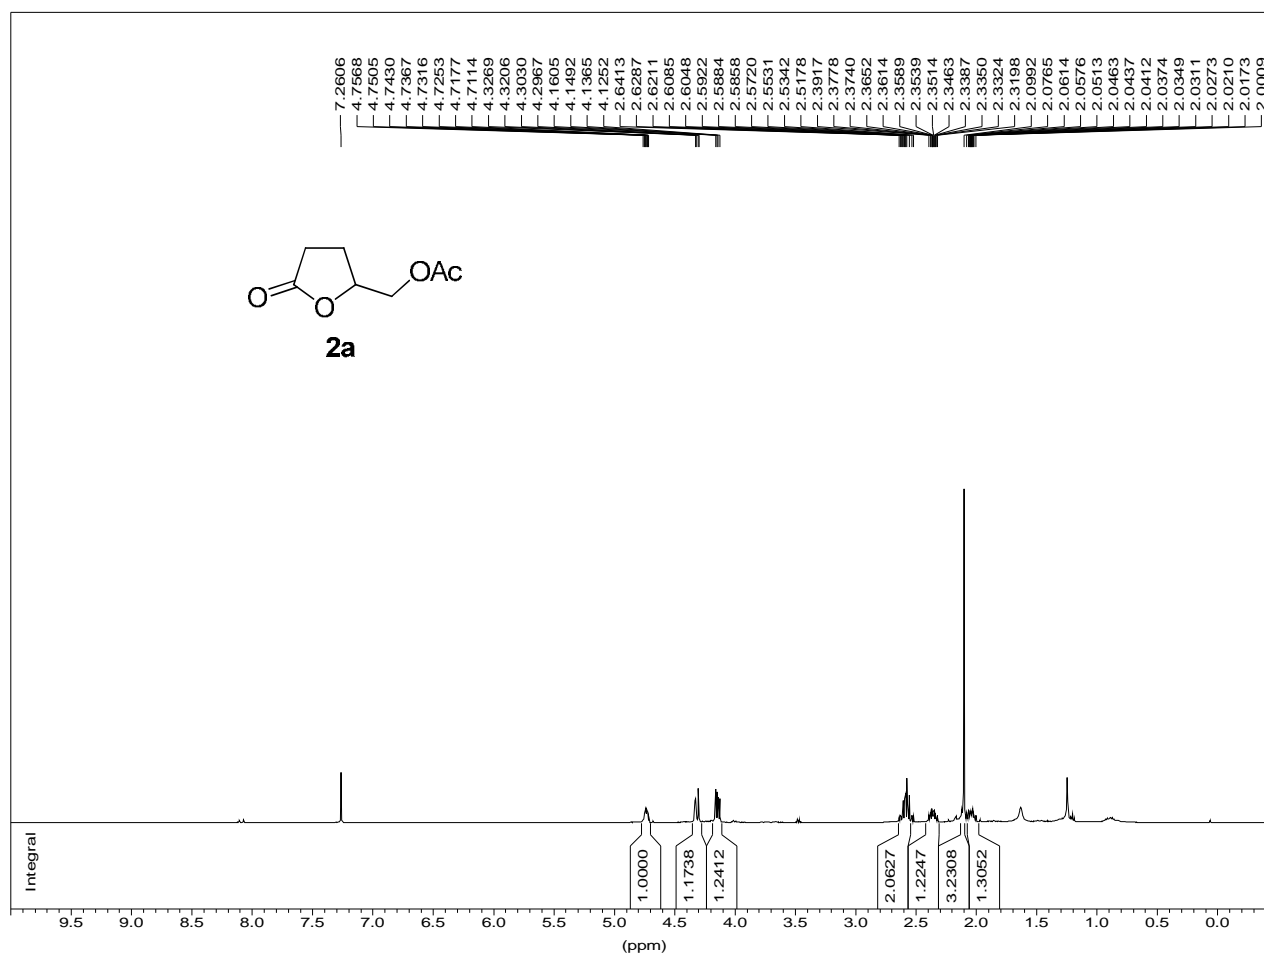

\*\*\* Current Data Parameters \*\*\*

NAME : ja15jas1  
EXPNO : 1  
PROCNO : 1

\*\*\* Acquisition Parameters \*\*\*

BF1 : 500.130000 MHz  
LOCNUC : 2H  
NS : 8  
O1 : 3088.51 Hz  
PULPROG : zg30  
SFO1 : 500.1330885 MHz  
SOLVENT : CDCl3  
SW : 20.6557 ppm

\*\*\* Processing Parameters \*\*\*

LB : 0.30 Hz  
PHC0 : 56.574 degree  
PHC1 : -1.075 degree

13C AMX500  
jas-2-9-1

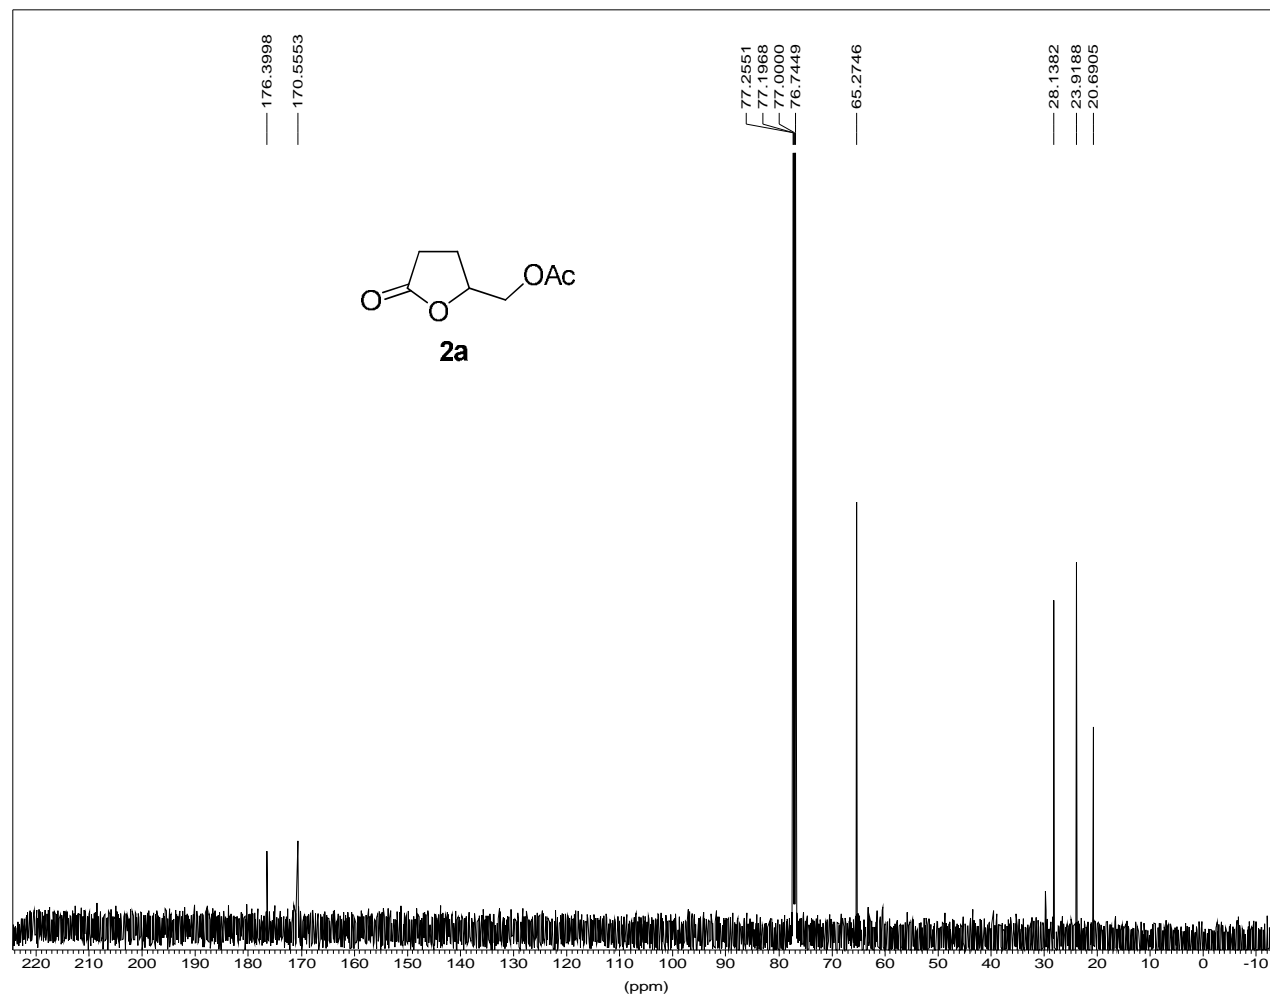

\*\*\* Current Data Parameters \*\*\*

NAME : ja15jas1  
EXPNO : 2  
PROCNO : 1

\*\*\* Acquisition Parameters \*\*\*

BF1 : 125.7577890 MHz  
LOCNUC : 2H  
NS : 236  
O1 : 13204.57 Hz  
PULPROG : zgpg30  
SFO1 : 125.7709936 MHz  
SOLVENT : CDCl3  
SW : 238.7675 ppm

\*\*\* Processing Parameters \*\*\*

LB : 1.00 Hz  
PHC0 : 184.629 degree  
PHC1 : 32.388 degree

1H normal range AC300  
jas-1-182-1

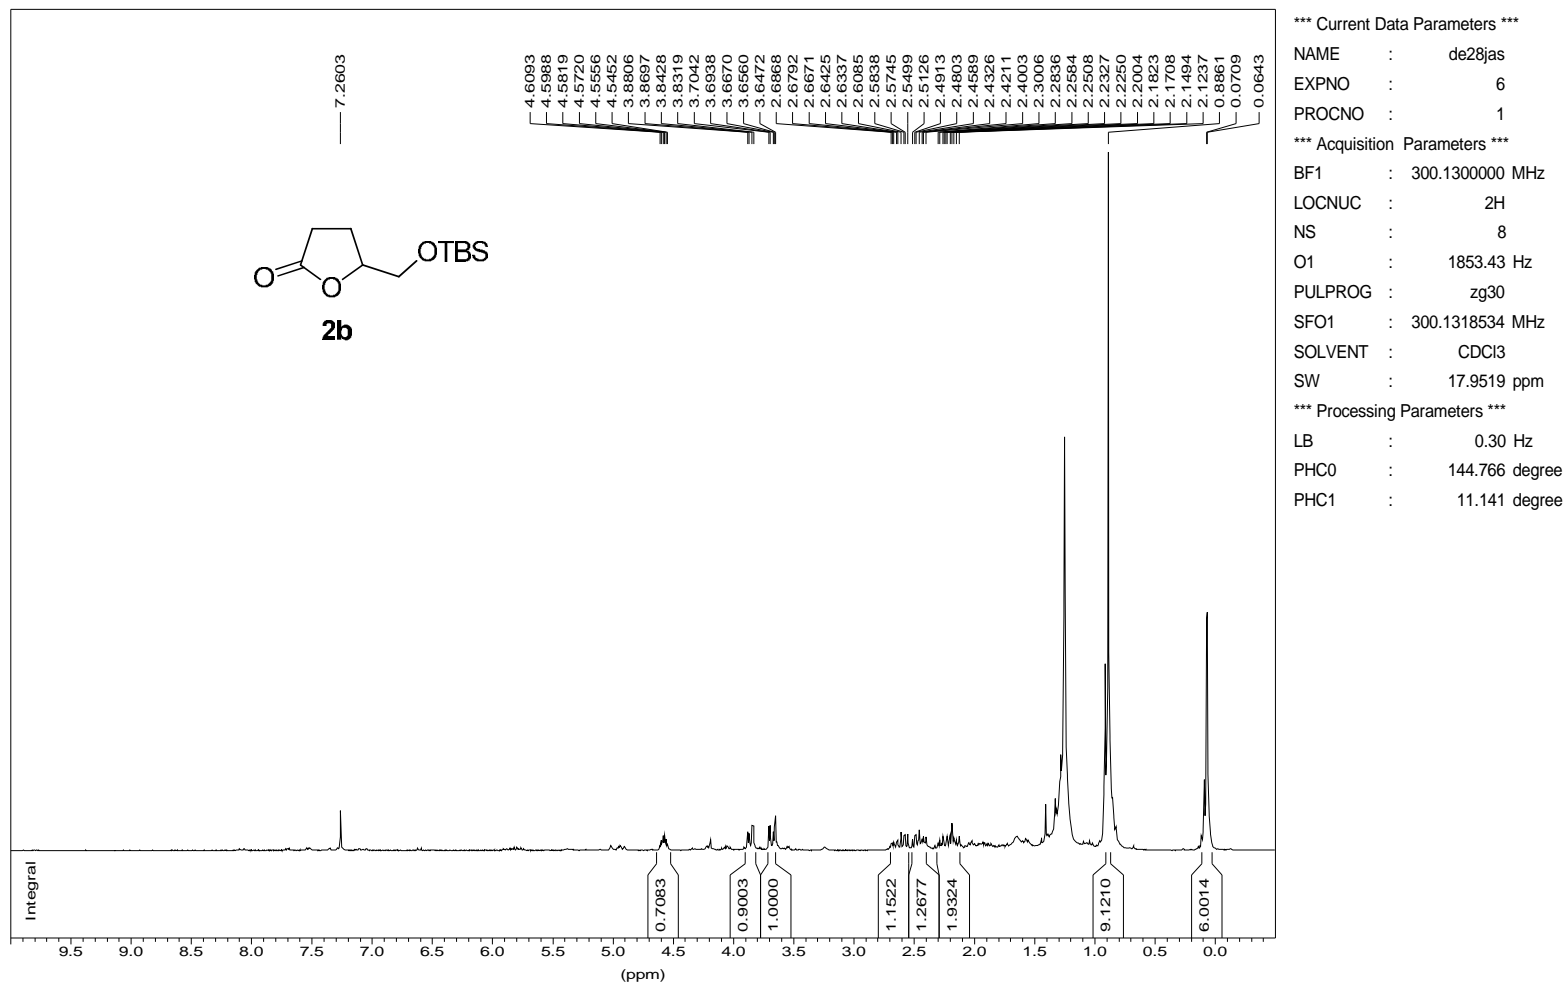

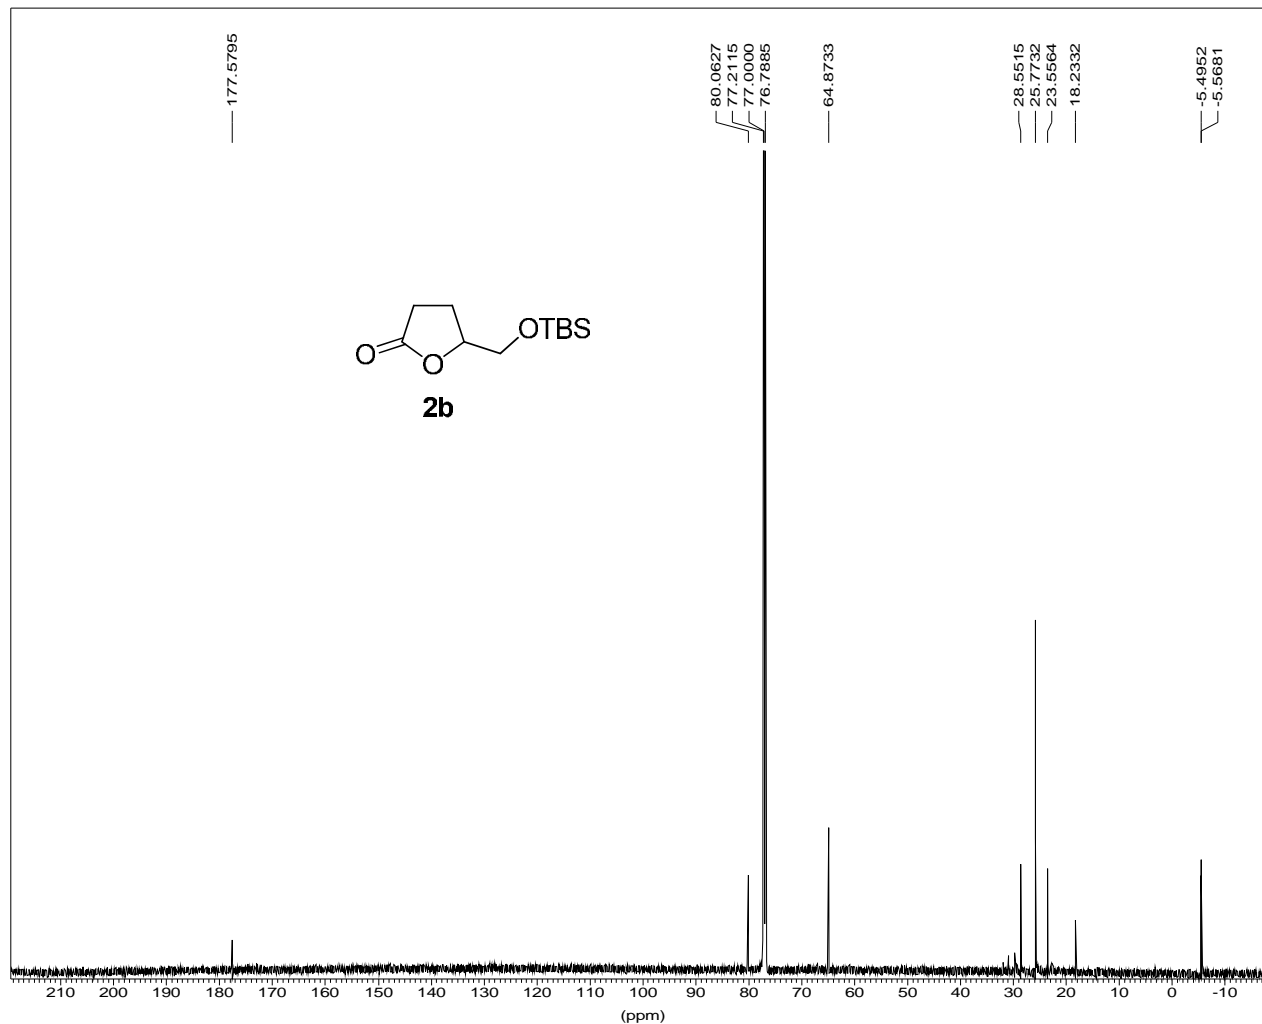

\*\*\* Current Data Parameters \*\*\*

NAME : 2013-j-2  
EXPNO : 3  
PROCNO : 1

\*\*\* Acquisition Parameters \*\*\*

BF1 : 150.9028090 MHz  
LOCNUC : 2H  
NS : 206  
O1 : 15089.81 Hz  
PULPROG : zgpg30  
SFO1 : 150.9178988 MHz  
SOLVENT : CDCl3  
SW : 238.9226 ppm

\*\*\* Processing Parameters \*\*\*

LB : 1.00 Hz  
PHC0 : 242.214 degree  
PHC1 : -121.130 degree



1H AMX500  
jas-1-172-1

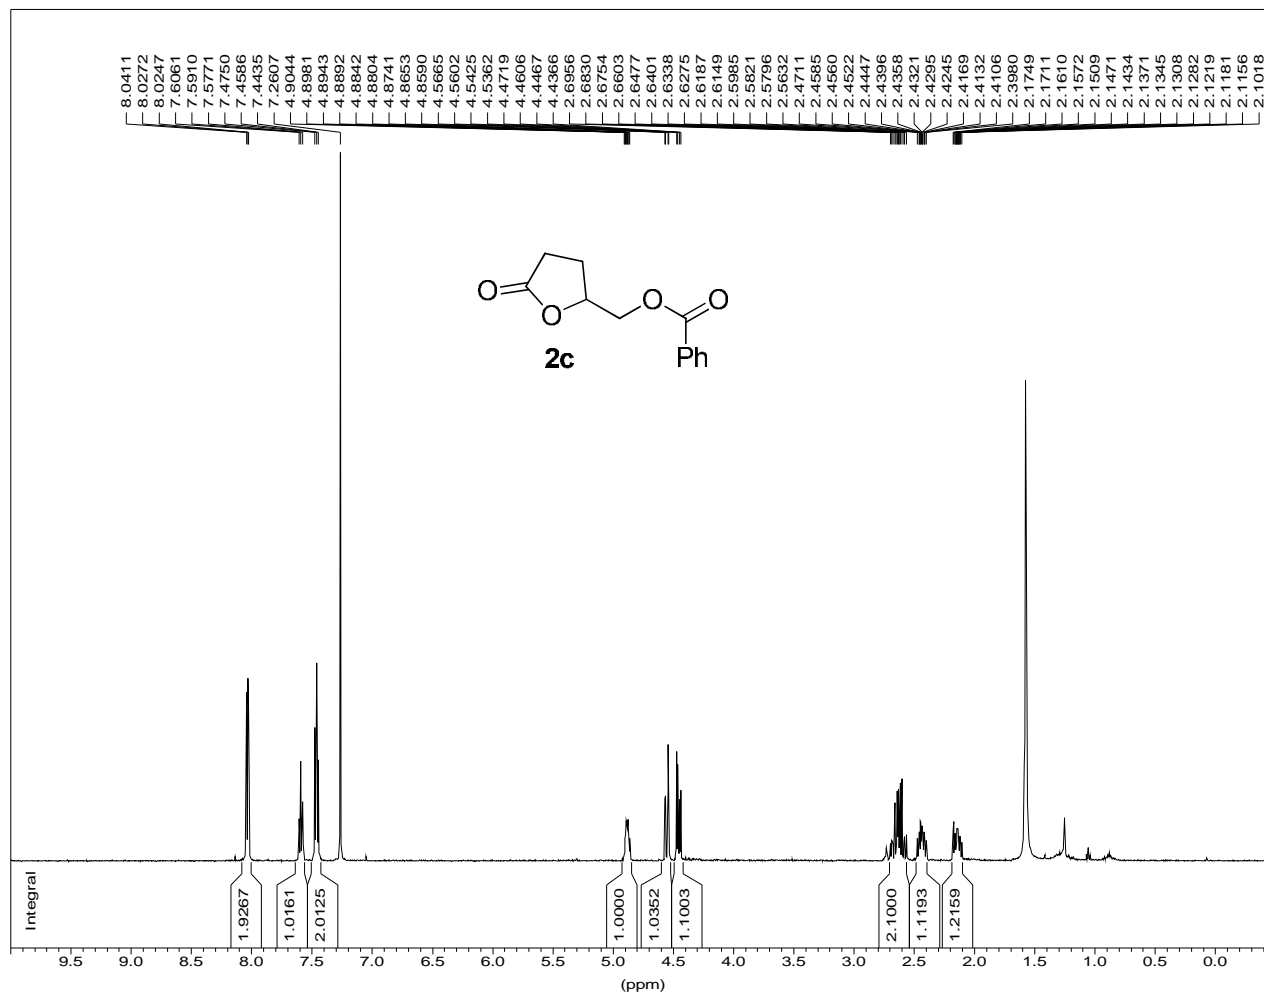

\*\*\* Current Data Parameters \*\*\*

NAME : zfy1221  
EXPNO : 9  
PROCNO : 1

\*\*\* Acquisition Parameters \*\*\*

BF1 : 500.130000 MHz  
LOCNUC : 2H  
NS : 8  
O1 : 3088.51 Hz  
PULPROG : zg30  
SFO1 : 500.1330885 MHz  
SOLVENT : CDCl3  
SW : 20.6557 ppm

\*\*\* Processing Parameters \*\*\*

LB : 0.30 Hz  
PHC0 : 60.233 degree  
PHC1 : 1.716 degree

13C AMX500

jas-1-172-1

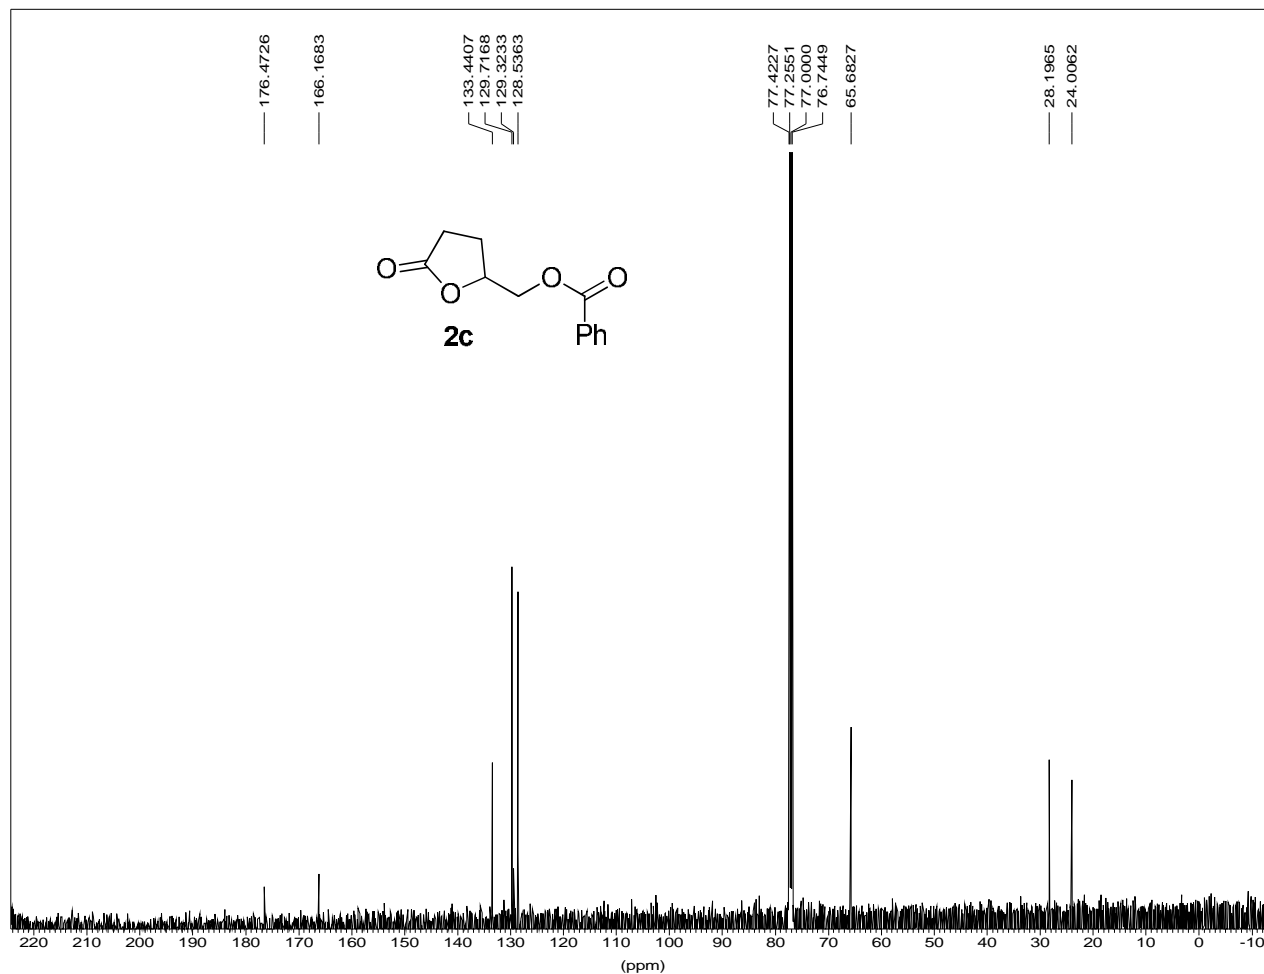

\*\*\* Current Data Parameters \*\*\*

NAME : zfy0111

EXPNO : 1

PROCNO : 1

\*\*\* Acquisition Parameters \*\*\*

BF1 : 125.7577890 MHz

LOCNUC : 2H

NS : 615

O1 : 13204.57 Hz

PULPROG : zgpg30

SFO1 : 125.7709936 MHz

SOLVENT : CDCl3

SW : 238.7675 ppm

\*\*\* Processing Parameters \*\*\*

LB : 1.00 Hz

PHC0 : 167.251 degree

PHC1 : 41.795 degree

1H normal range AC300

jas-1-176-1

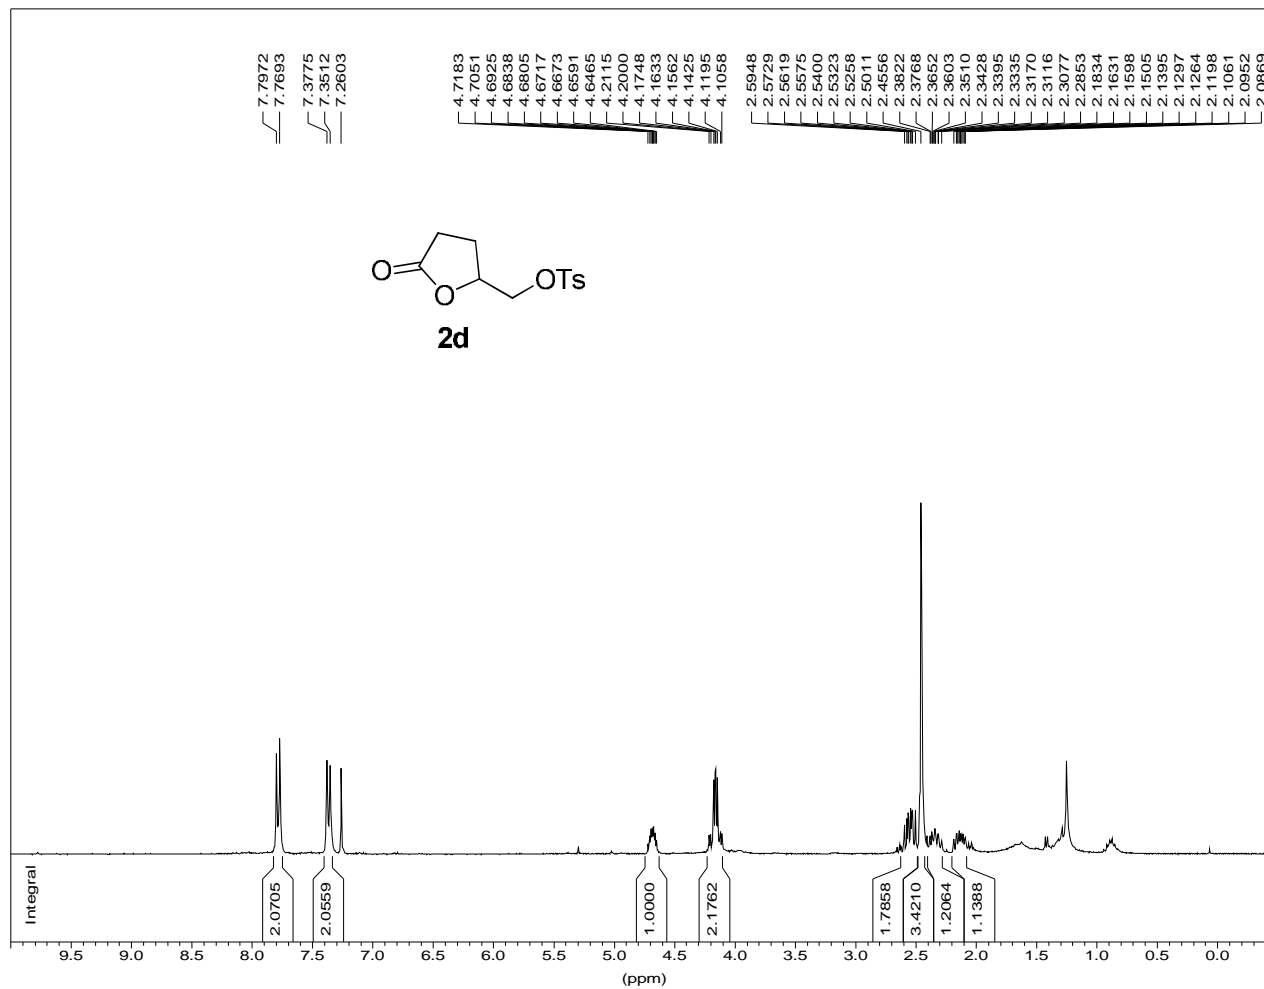

\*\*\* Current Data Parameters \*\*\*

NAME : dejas26  
EXPNO : 2  
PROCNO : 1

\*\*\* Acquisition Parameters \*\*\*

BF1 : 300.130000 MHz  
LOCNUC : 2H  
NS : 8  
O1 : 1853.43 Hz  
PULPROG : zg30  
SFO1 : 300.1318534 MHz  
SOLVENT : CDCl3  
SW : 17.9519 ppm

\*\*\* Processing Parameters \*\*\*

LB : 0.30 Hz  
PHC0 : 292.496 degree  
PHC1 : 15.095 degree

13C Standard AC300

jas-1-176-1

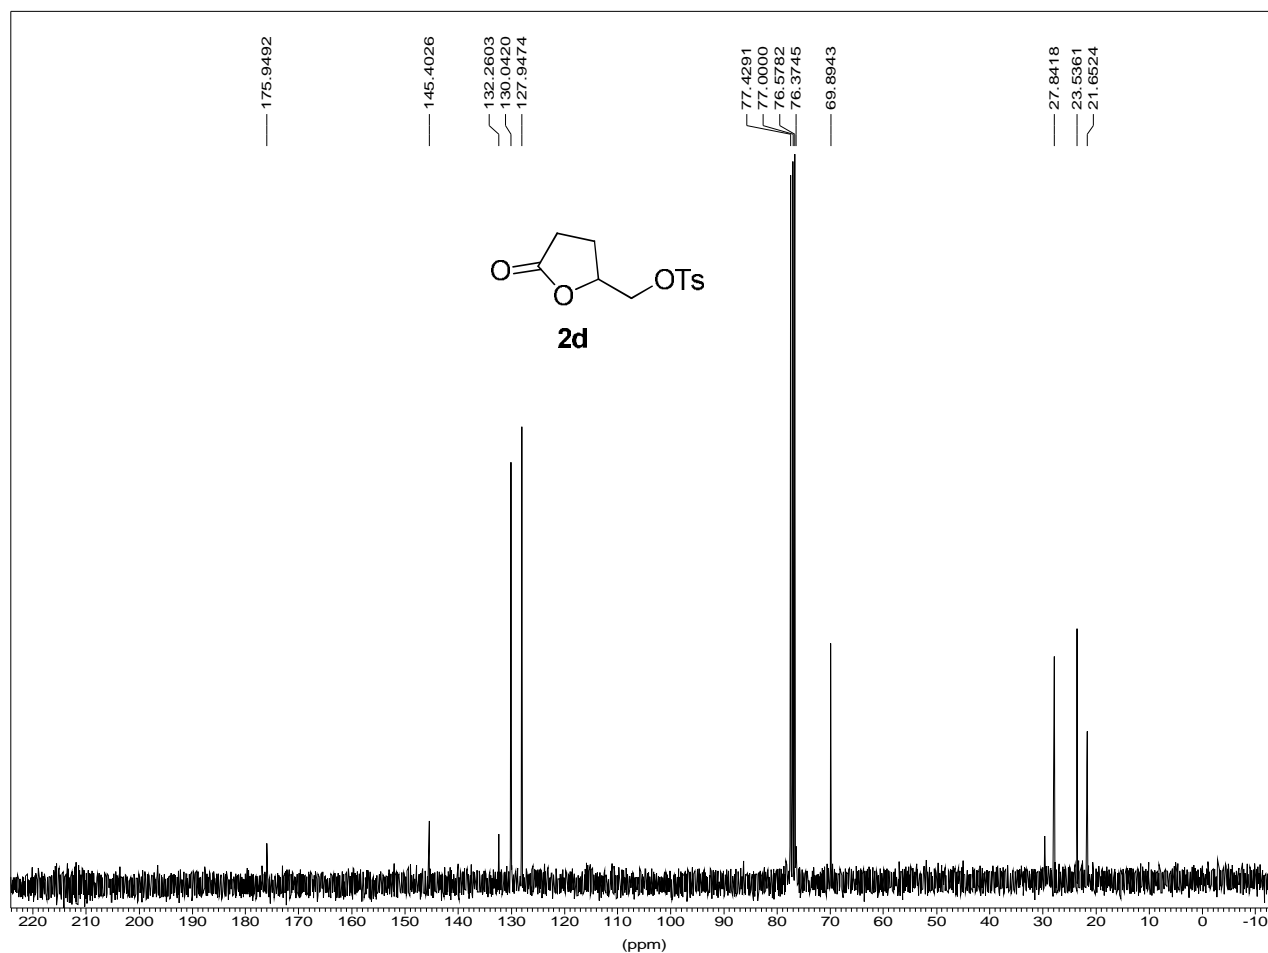

\*\*\* Current Data Parameters \*\*\*

NAME : de27jas  
EXPNO : 3  
PROCNO : 1

\*\*\* Acquisition Parameters \*\*\*

BF1 : 75.4677490 MHz  
LOCNUC : 2H  
NS : 1000  
O1 : 7924.11 Hz  
PULPROG : zgpg30  
SFO1 : 75.4756731 MHz  
SOLVENT : CDCl3  
SW : 238.2968 ppm

\*\*\* Processing Parameters \*\*\*

LB : 1.00 Hz  
PHC0 : 10.834 degree  
PHC1 : 20.848 degree

1H AMX500  
jas-2-38-2

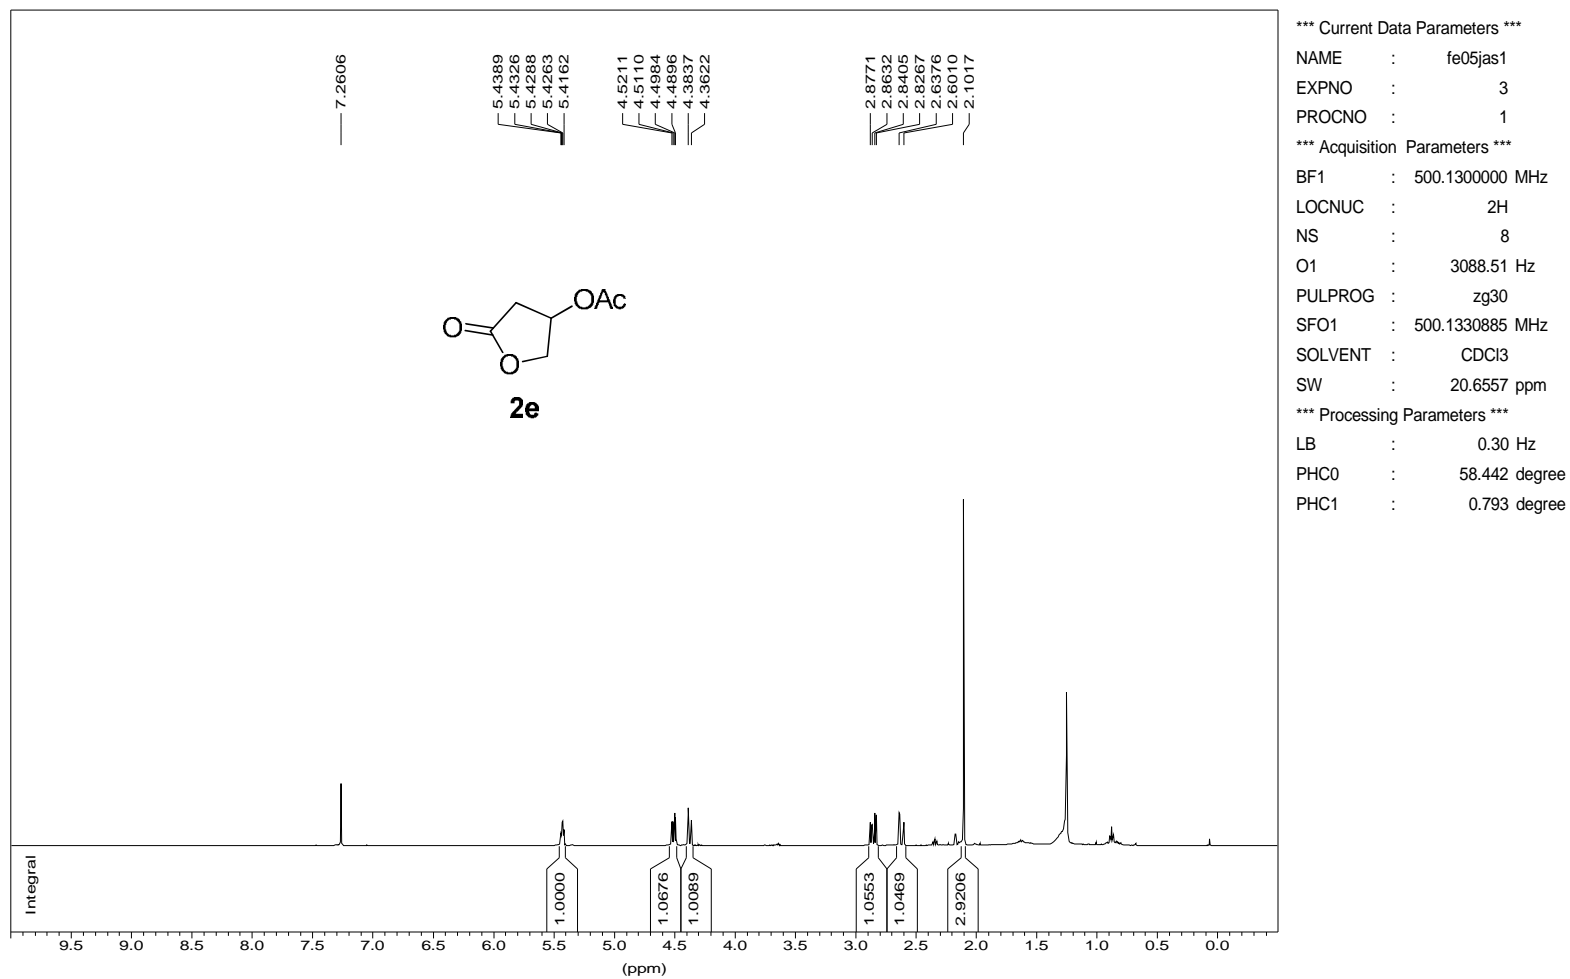

13C AMX500

jas-2-38-2

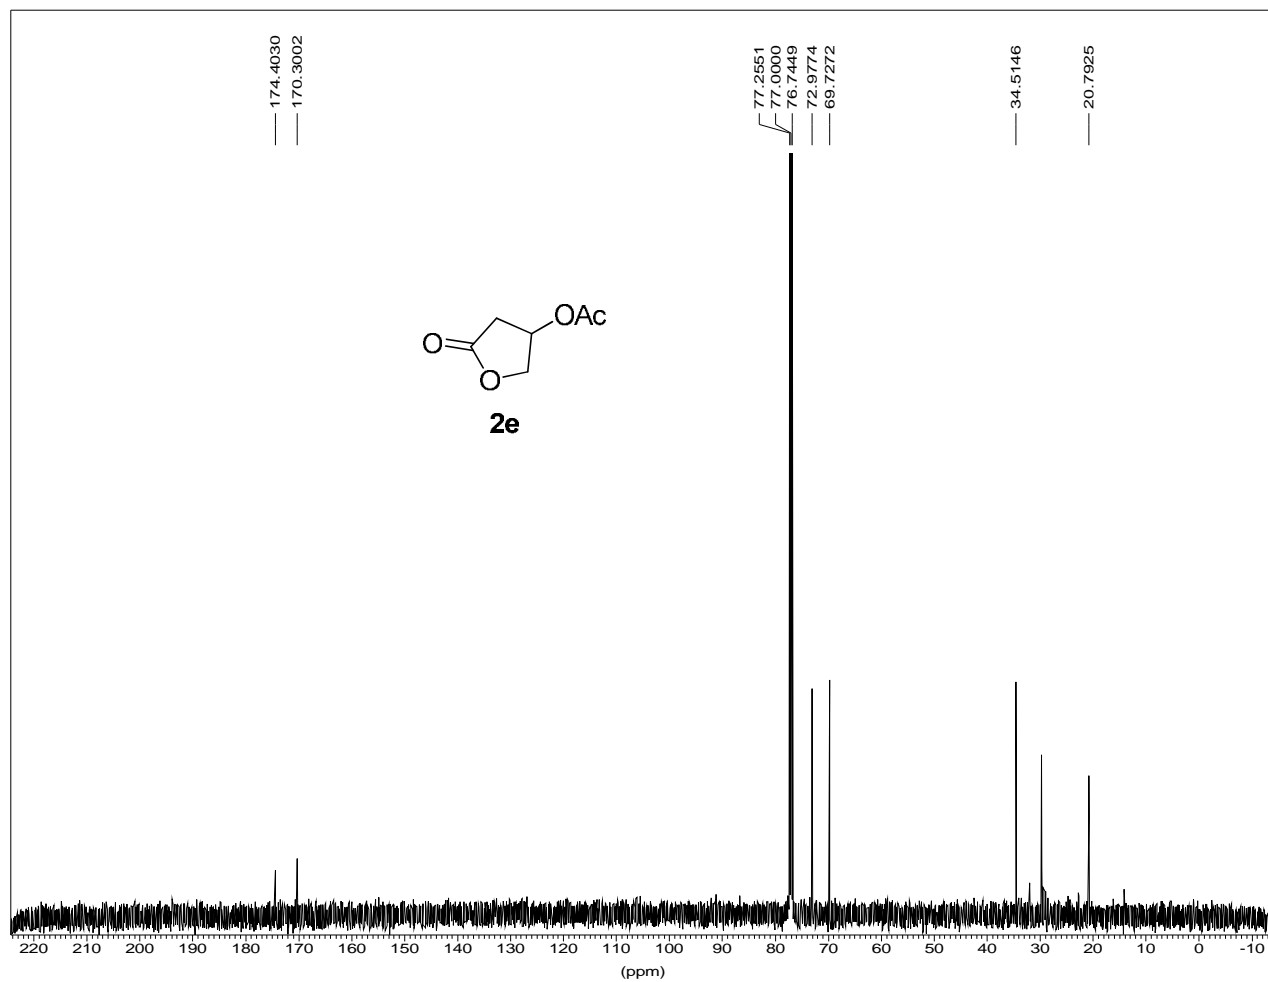

\*\*\* Current Data Parameters \*\*\*

NAME : fe05jas1

EXPNO : 4

PROCNO : 1

\*\*\* Acquisition Parameters \*\*\*

BF1 : 125.7577890 MHz

LOCNUC : 2H

NS : 343

O1 : 13204.57 Hz

PULPROG : zgpg30

SFO1 : 125.7709936 MHz

SOLVENT : CDCl3

SW : 238.7675 ppm

\*\*\* Processing Parameters \*\*\*

LB : 1.00 Hz

PHC0 : 188.455 degree

PHC1 : 29.919 degree

1H normal range AC300

139-9-11

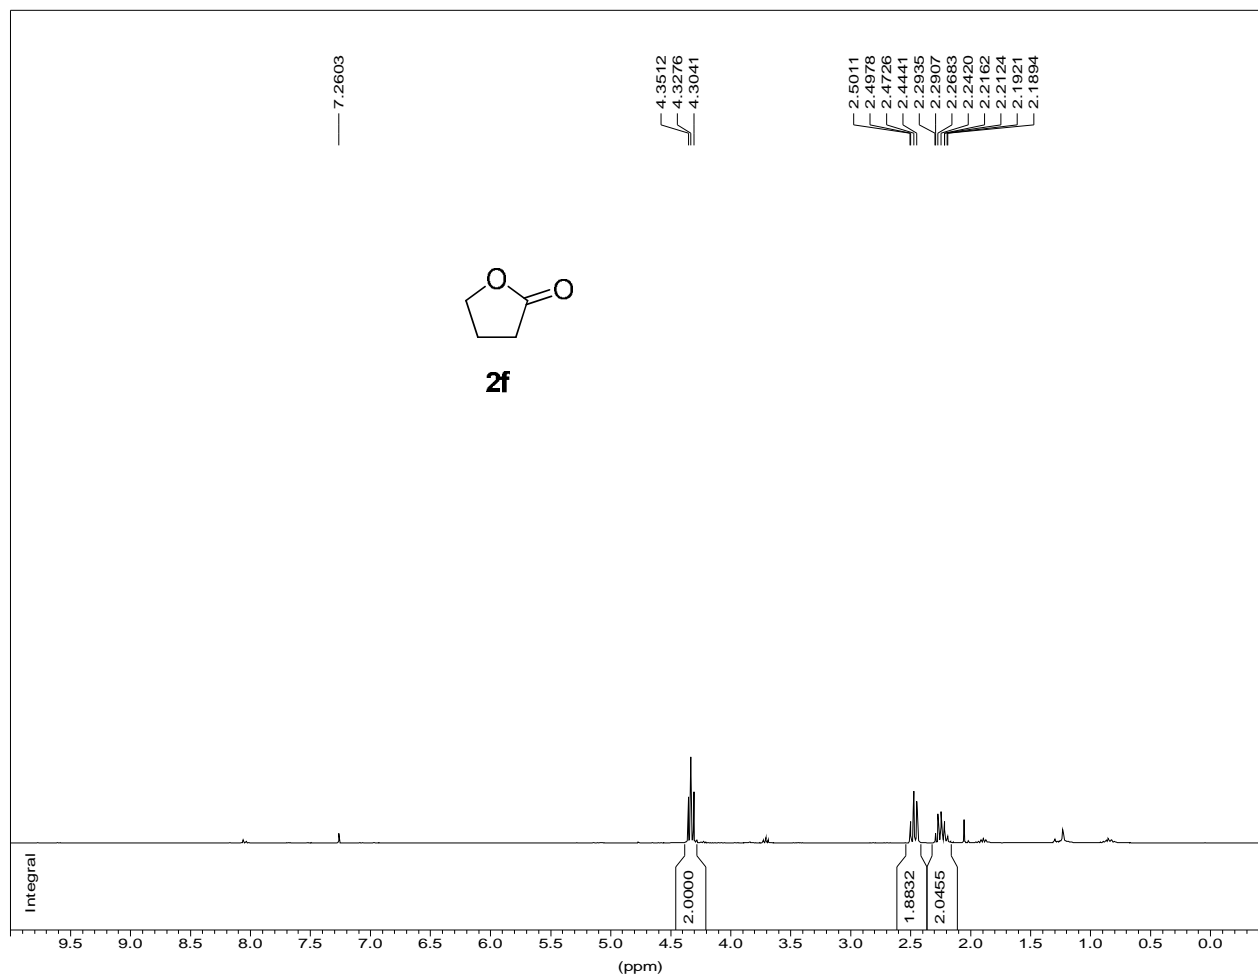

\*\*\* Current Data Parameters \*\*\*

NAME : ma23hwk

EXPNO : 2

PROCNO : 1

\*\*\* Acquisition Parameters \*\*\*

BF1 : 300.1300000 MHz

LOCNUC : 2H

NS : 8

O1 : 1853.43 Hz

PULPROG : zg30

SFO1 : 300.1318534 MHz

SOLVENT : CDCl3

SW : 17.9519 ppm

\*\*\* Processing Parameters \*\*\*

LB : 0.30 Hz

PHC0 : 190.734 degree

PHC1 : 50.514 degree

13C Standard AC300

139-9-11

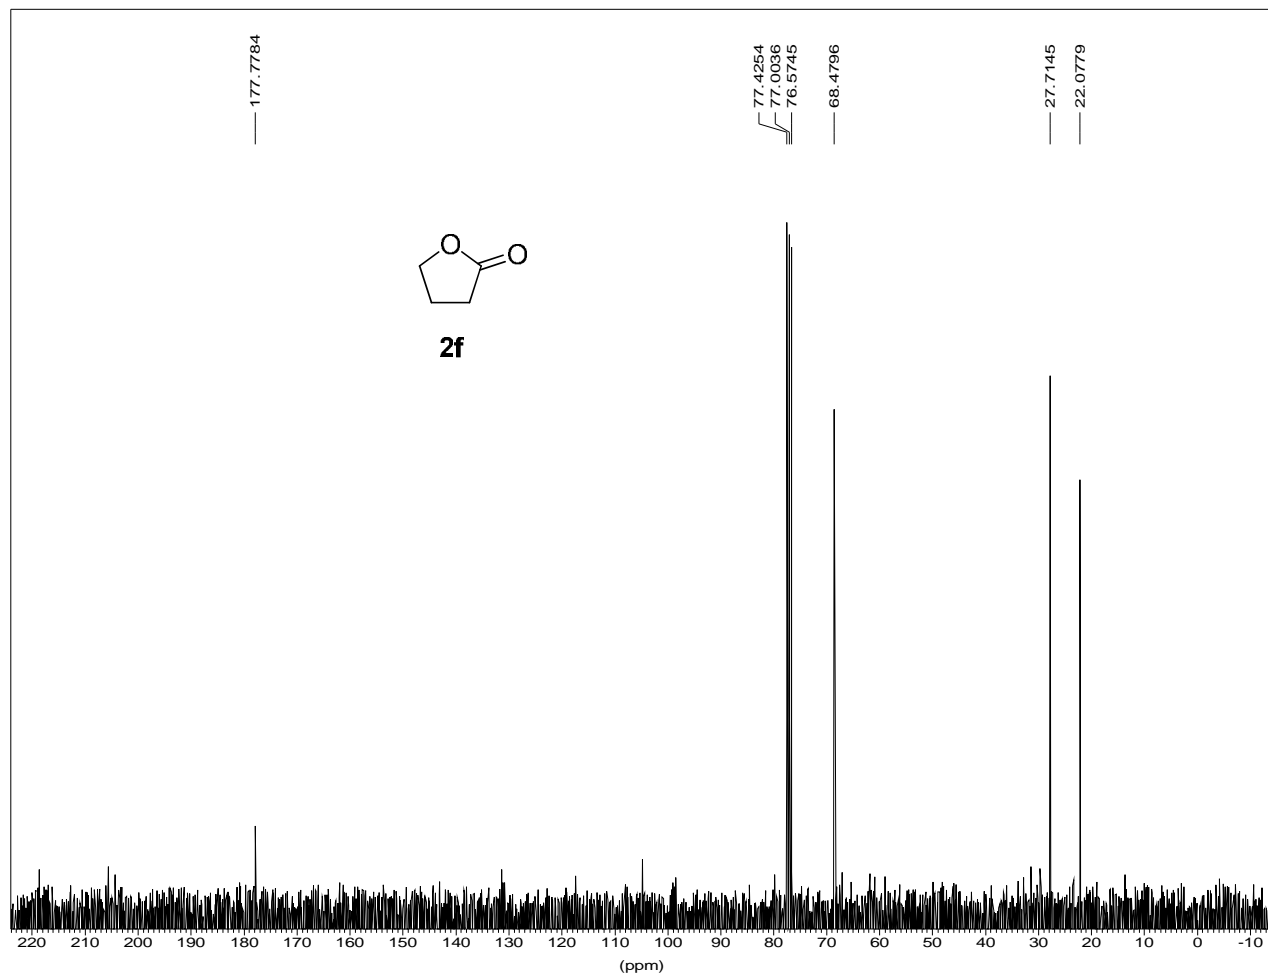

\*\*\* Current Data Parameters \*\*\*

NAME : ma23hwk

EXPNO : 3

PROCNO : 1

\*\*\* Acquisition Parameters \*\*\*

BF1 : 75.4677490 MHz

LOCNUC : 2H

NS : 51

O1 : 7924.11 Hz

PULPROG : zgpg30

SFO1 : 75.4756731 MHz

SOLVENT : CDCl3

SW : 238.2968 ppm

\*\*\* Processing Parameters \*\*\*

LB : 1.00 Hz

PHC0 : 126.884 degree

PHC1 : 18.691 degree



1H normal range AC300

133- 7-9

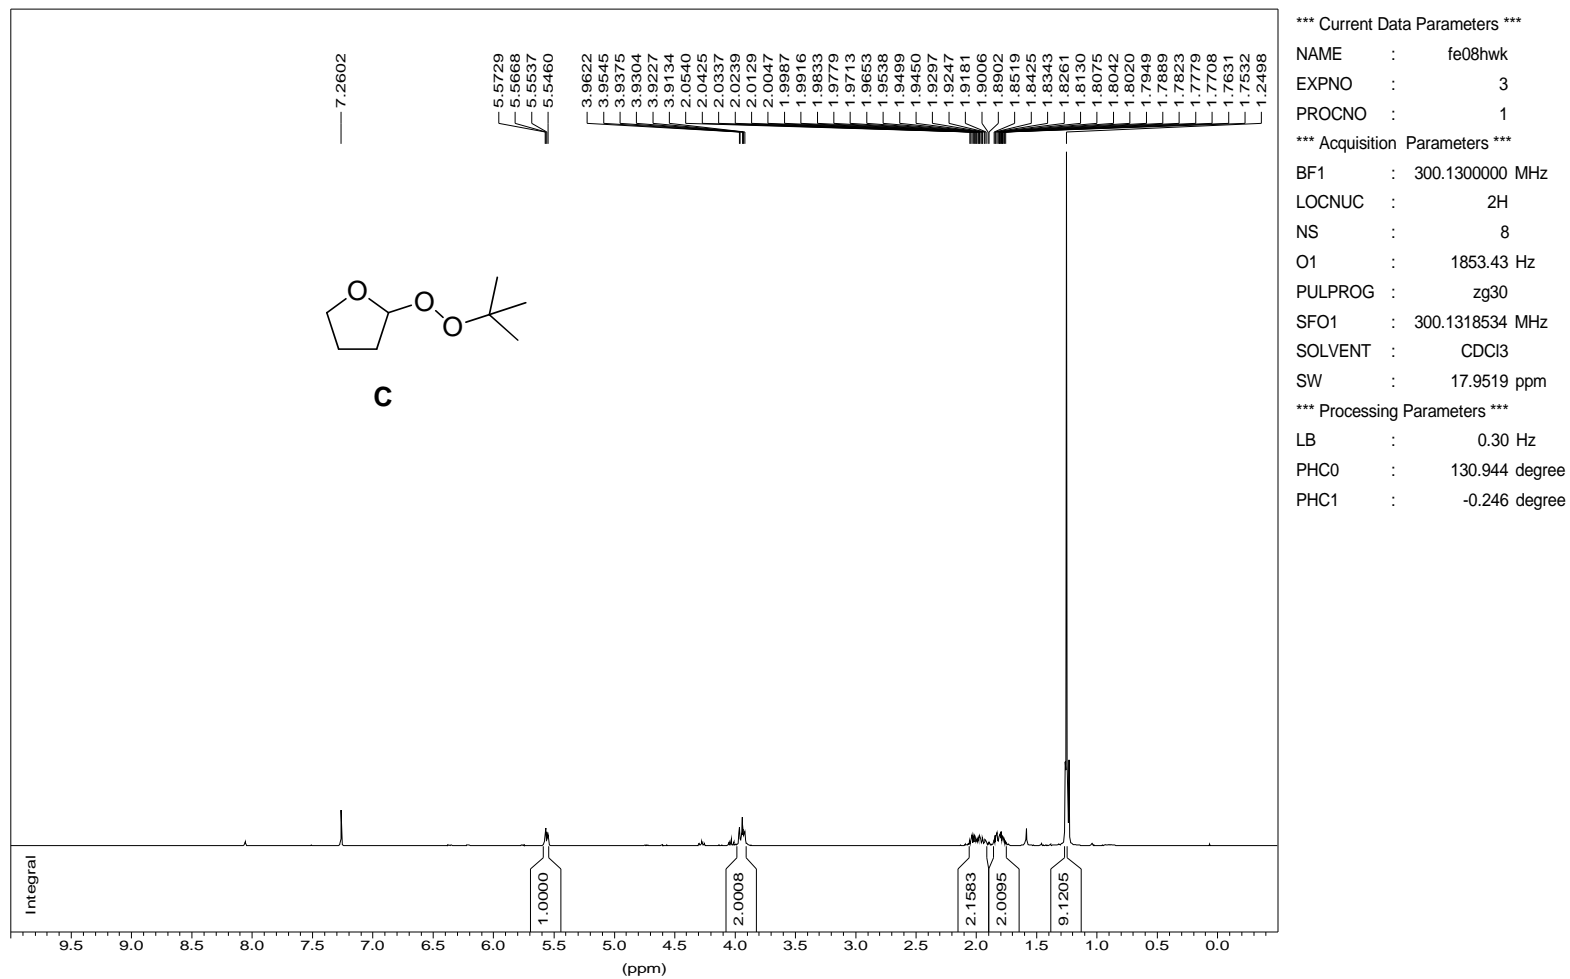

13C Standard AC300

133-THF

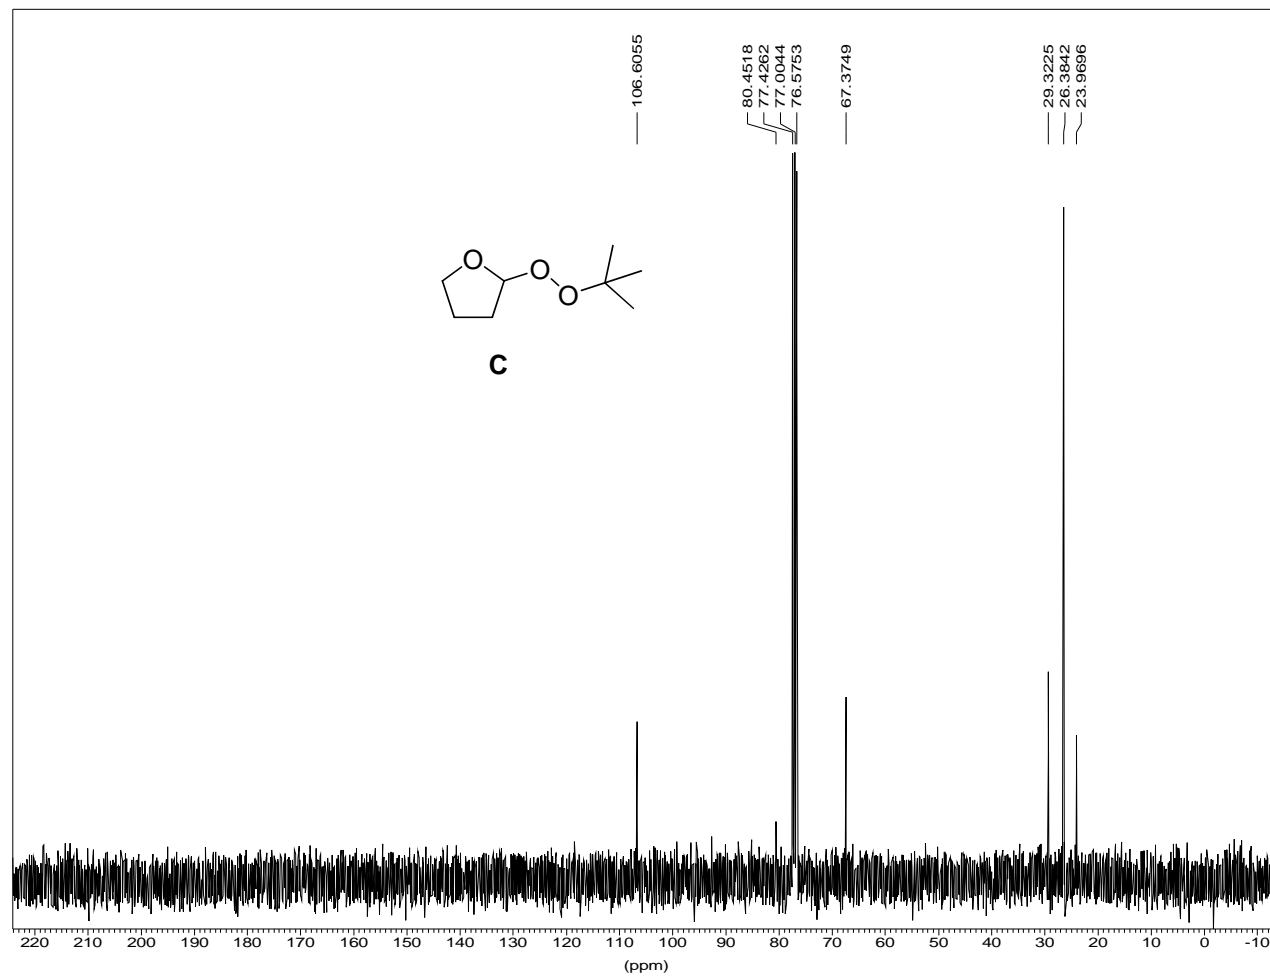

\*\*\* Current Data Parameters \*\*\*

NAME : fe10hwk  
EXPNO : 3  
PROCNO : 1

\*\*\* Acquisition Parameters \*\*\*

BF1 : 75.4677490 MHz  
LOCNUC : 2H  
NS : 206  
O1 : 7924.11 Hz  
PULPROG : zgpg30  
SFO1 : 75.4756731 MHz  
SOLVENT : CDCl3  
SW : 238.2968 ppm

\*\*\* Processing Parameters \*\*\*

LB : 1.00 Hz  
PHC0 : 91.206 degree  
PHC1 : -78.407 degree

1H AMX500

Jas-2-44-1

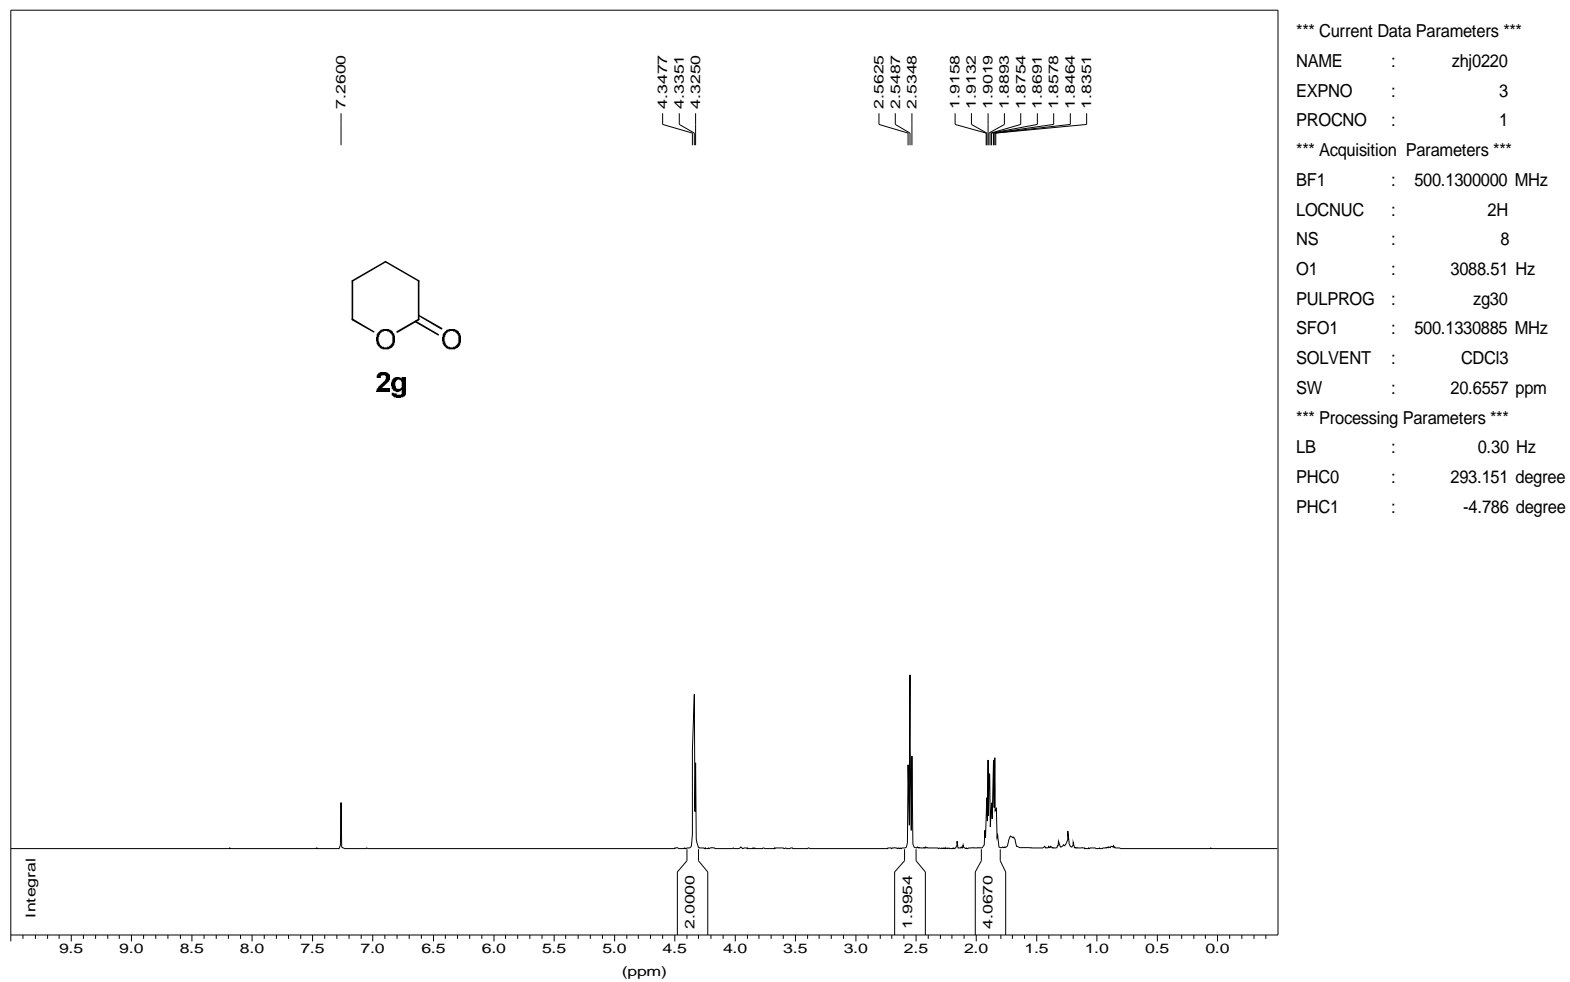

13C Standard AC300

jas-2-44-1

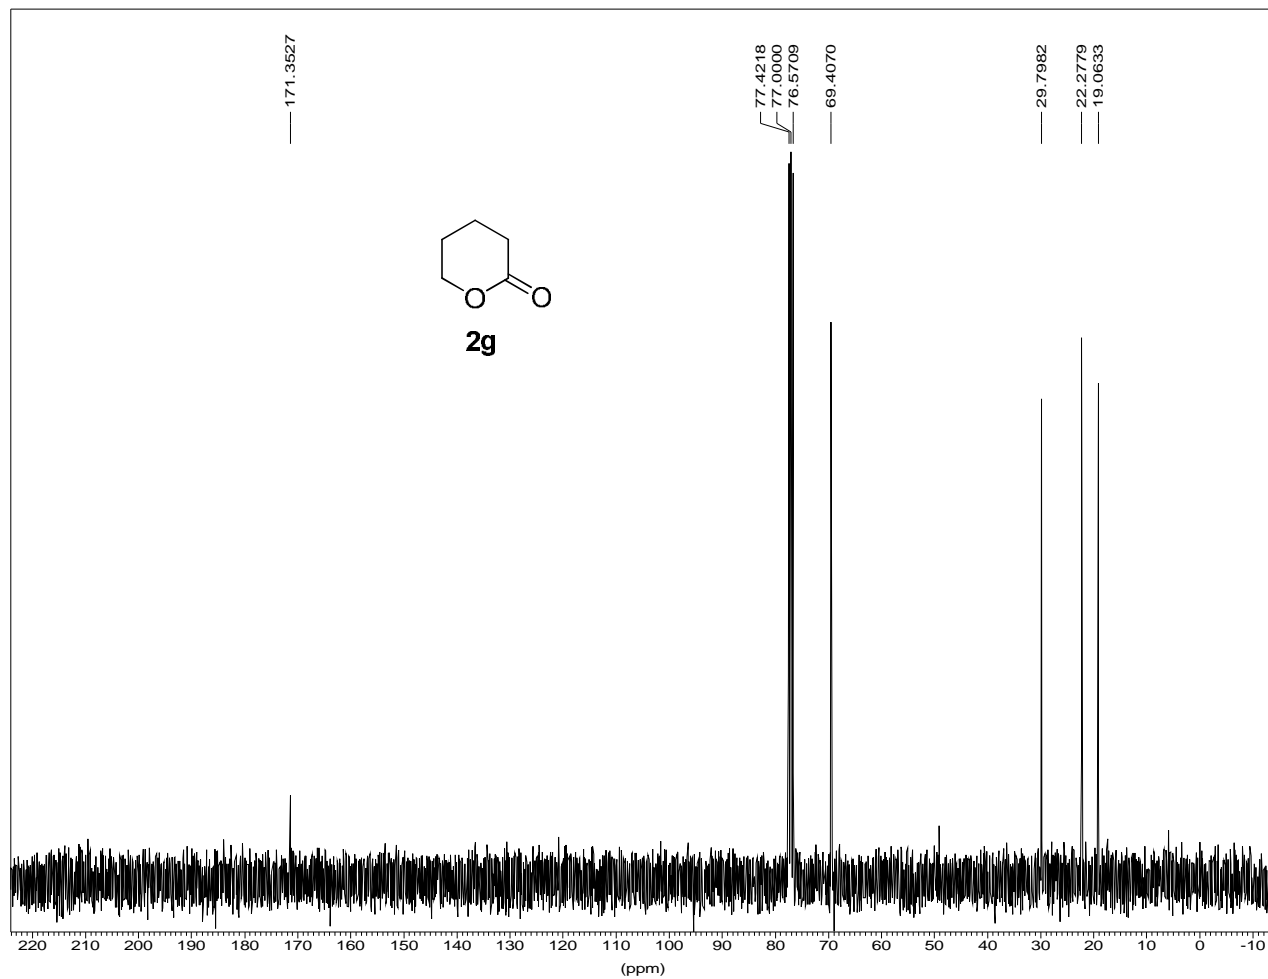

\*\*\* Current Data Parameters \*\*\*

NAME : ma11jas  
EXPNO : 2  
PROCNO : 1

\*\*\* Acquisition Parameters \*\*\*

BF1 : 75.4677490 MHz  
LOCNUC : 2H  
NS : 416  
O1 : 7924.11 Hz  
PULPROG : zgpg30  
SFO1 : 75.4756731 MHz  
SOLVENT : CDCl3  
SW : 238.2968 ppm

\*\*\* Processing Parameters \*\*\*

LB : 1.00 Hz  
PHC0 : 202.782 degree  
PHC1 : 9.367 degree

1H normal range AC300

68

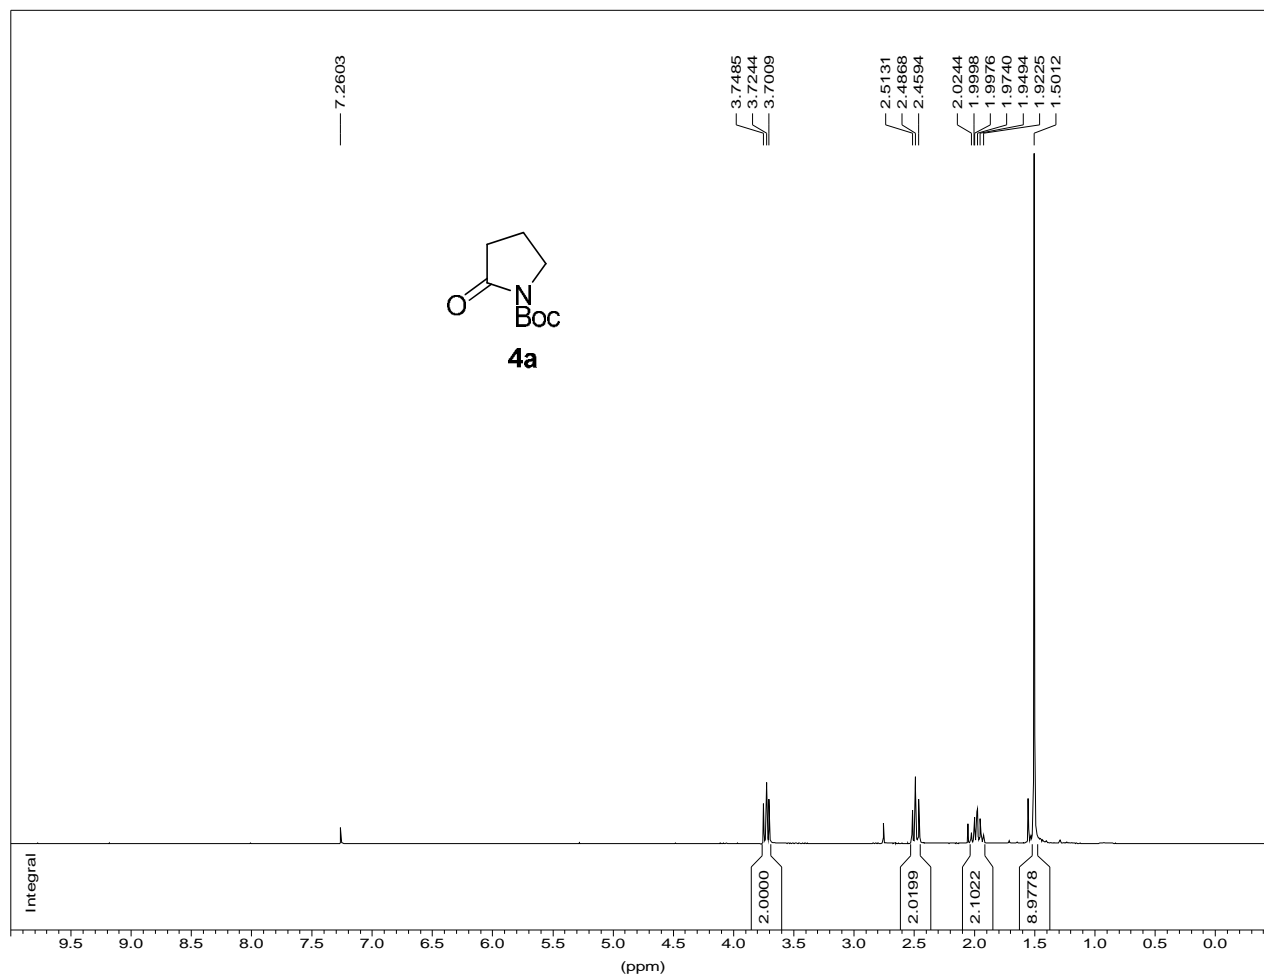

\*\*\* Current Data Parameters \*\*\*

NAME : oc22hwk  
EXPNO : 1  
PROCNO : 1

\*\*\* Acquisition Parameters \*\*\*

BF1 : 300.130000 MHz  
LOCNUC : 2H  
NS : 8  
O1 : 1853.43 Hz  
PULPROG : zg30  
SFO1 : 300.1318534 MHz  
SOLVENT : CDCl3  
SW : 17.9519 ppm

\*\*\* Processing Parameters \*\*\*

LB : 0.30 Hz  
PHC0 : 69.492 degree  
PHC1 : -32.321 degree

13C Standard AC300

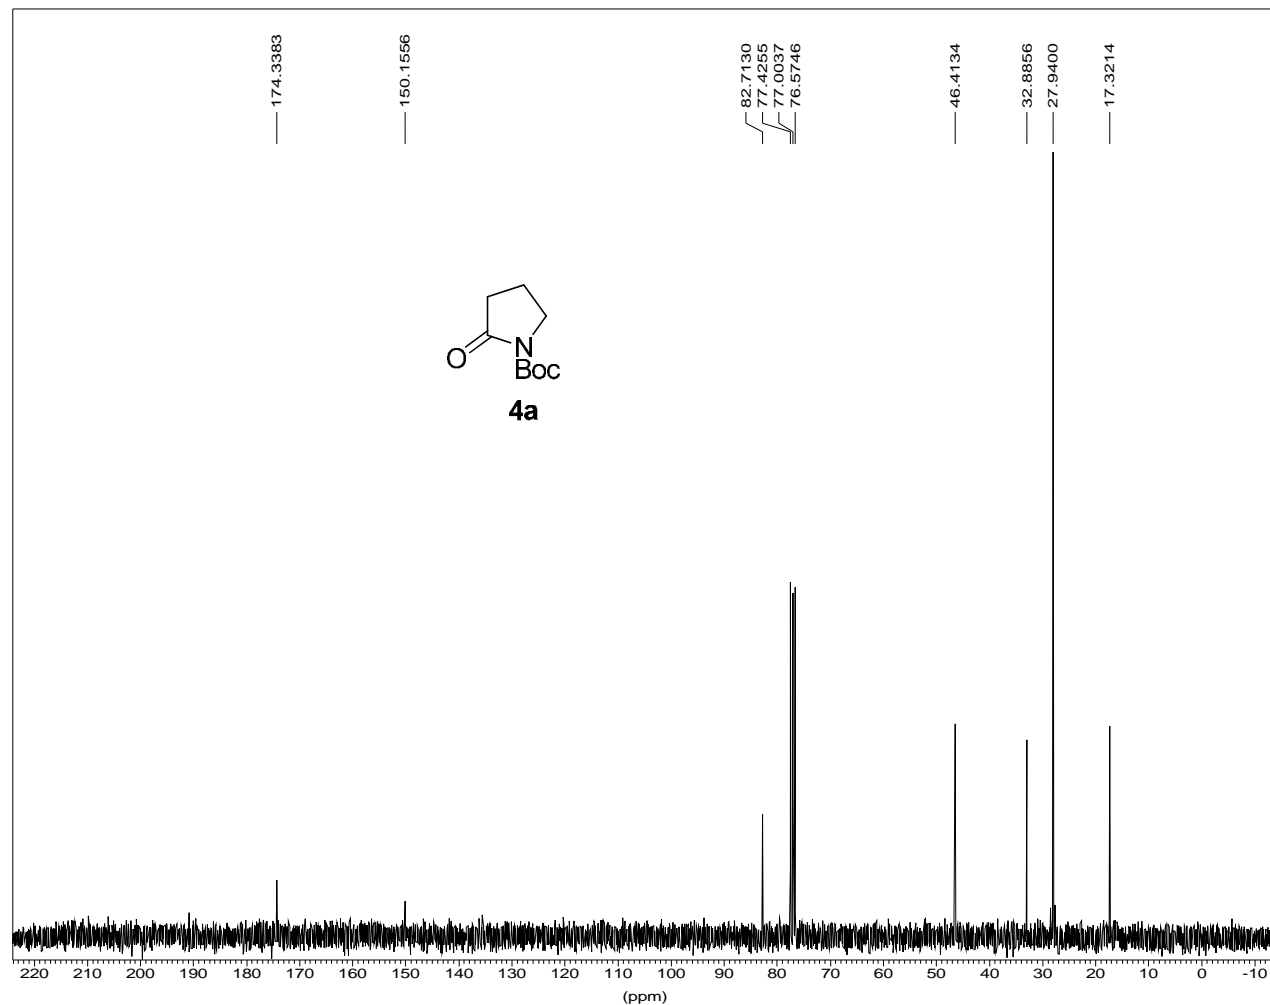

\*\*\* Current Data Parameters \*\*\*

NAME : oc22hwk  
EXPNO : 2  
PROCNO : 1

\*\*\* Acquisition Parameters \*\*\*

BF1 : 75.4677490 MHz  
LOCNUC : 2H  
NS : 80  
O1 : 7924.11 Hz  
PULPROG : zgpg30  
SFO1 : 75.4756731 MHz  
SOLVENT : CDCl3  
SW : 238.2968 ppm

\*\*\* Processing Parameters \*\*\*

LB : 1.00 Hz  
PHC0 : 231.564 degree  
PHC1 : -13.674 degree

1H normal range AC300

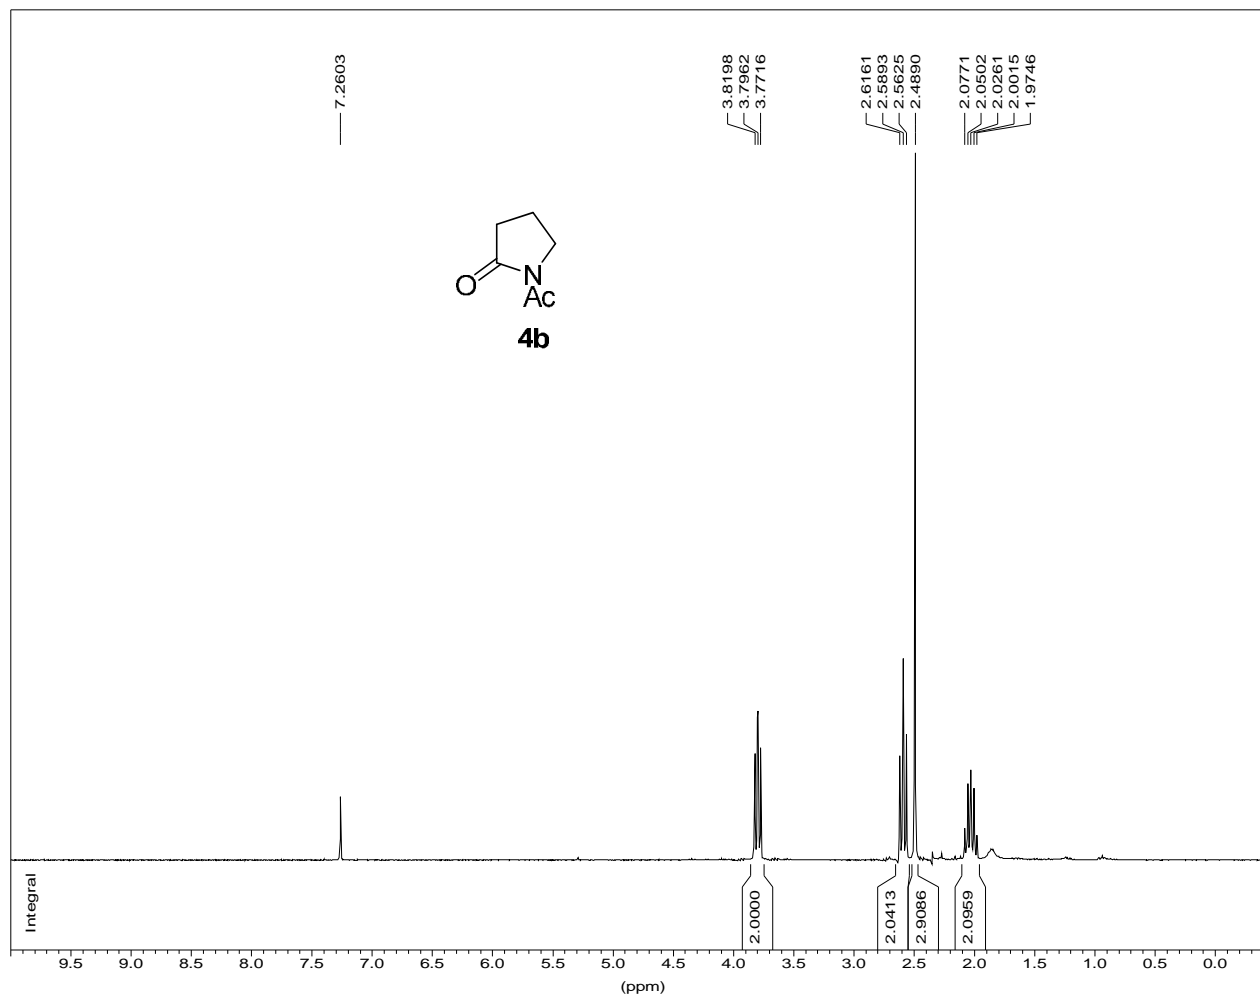

\*\*\* Current Data Parameters \*\*\*

NAME : oc26hwk  
EXPNO : 1  
PROCNO : 1

\*\*\* Acquisition Parameters \*\*\*

BF1 : 300.130000 MHz  
LOCNUC : 2H  
NS : 8  
O1 : 1853.43 Hz  
PULPROG : zg30  
SFO1 : 300.1318534 MHz  
SOLVENT : CDCl3  
SW : 17.9519 ppm

\*\*\* Processing Parameters \*\*\*

LB : 0.30 Hz  
PHC0 : 310.673 degree  
PHC1 : -4.202 degree

13C Standard AC300

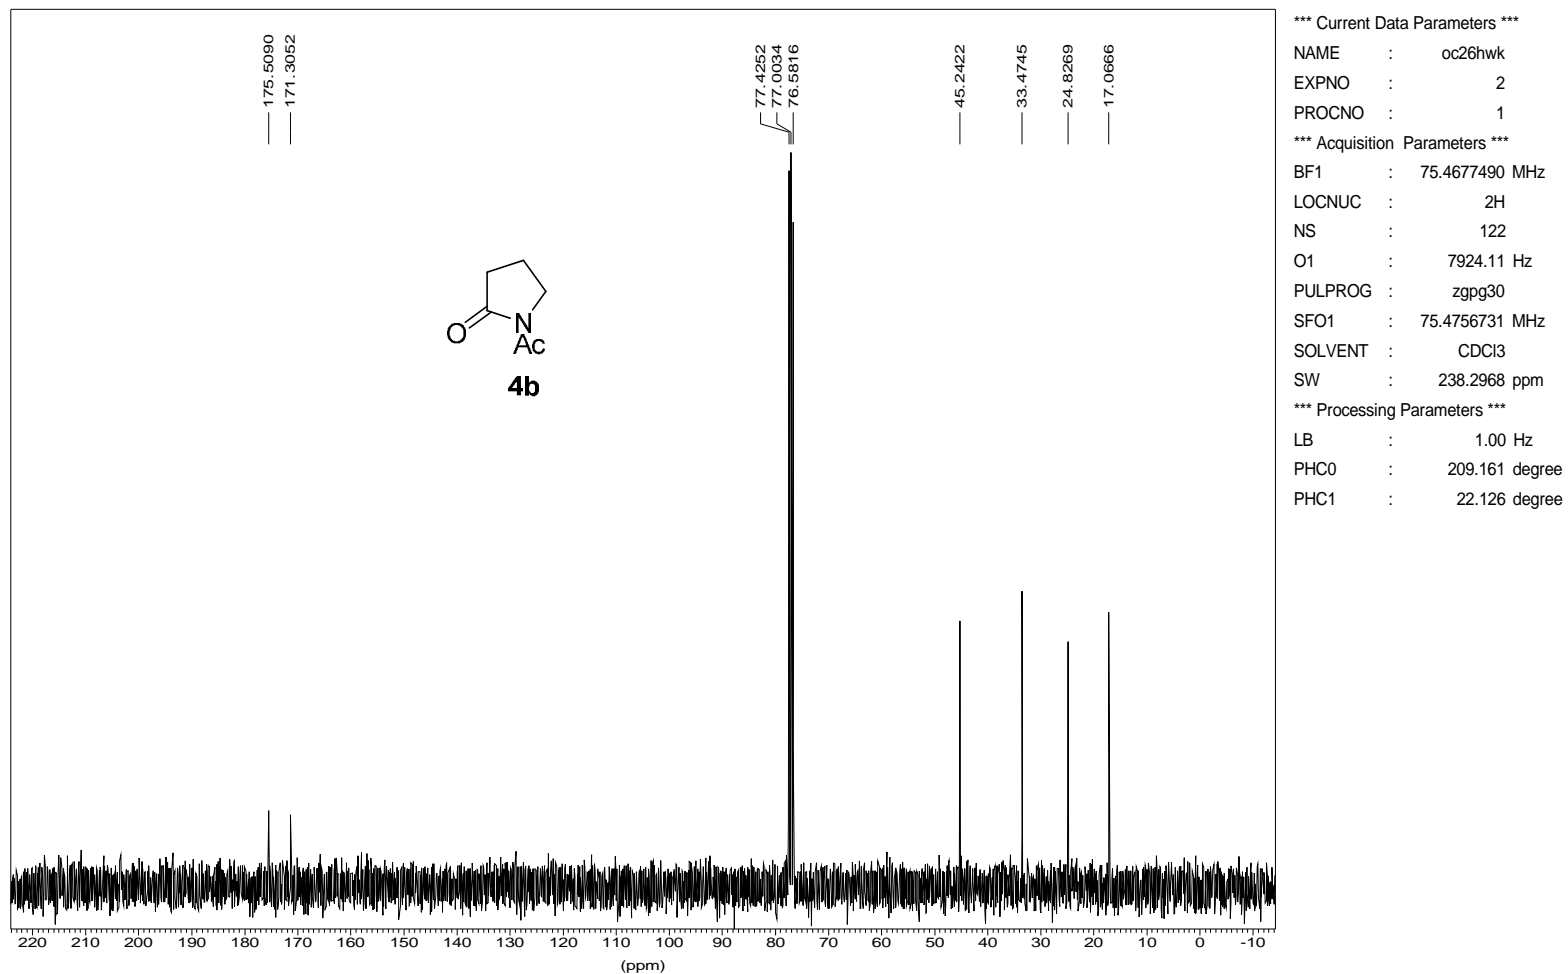



1H normal range AC300

77

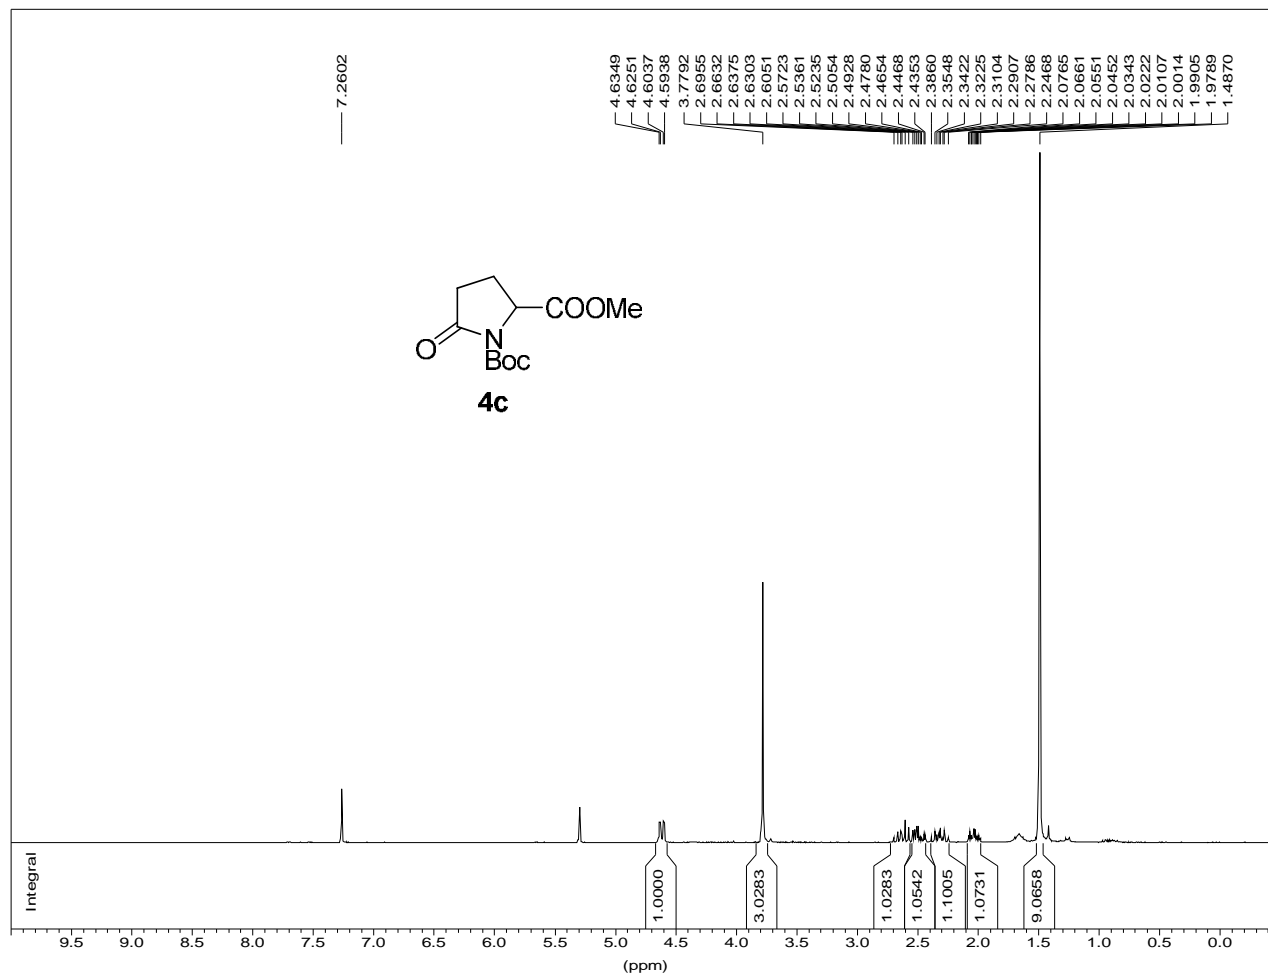

\*\*\* Current Data Parameters \*\*\*

NAME : nv08hwk  
EXPNO : 2  
PROCNO : 1

\*\*\* Acquisition Parameters \*\*\*

BF1 : 300.1300000 MHz  
LOCNUC : 2H  
NS : 8  
O1 : 1853.43 Hz  
PULPROG : zg30  
SFO1 : 300.1318534 MHz  
SOLVENT : CDCl3  
SW : 17.9519 ppm

\*\*\* Processing Parameters \*\*\*

LB : 0.30 Hz  
PHC0 : 304.447 degree  
PHC1 : -3.649 degree

13C Standard AC300

7714,15

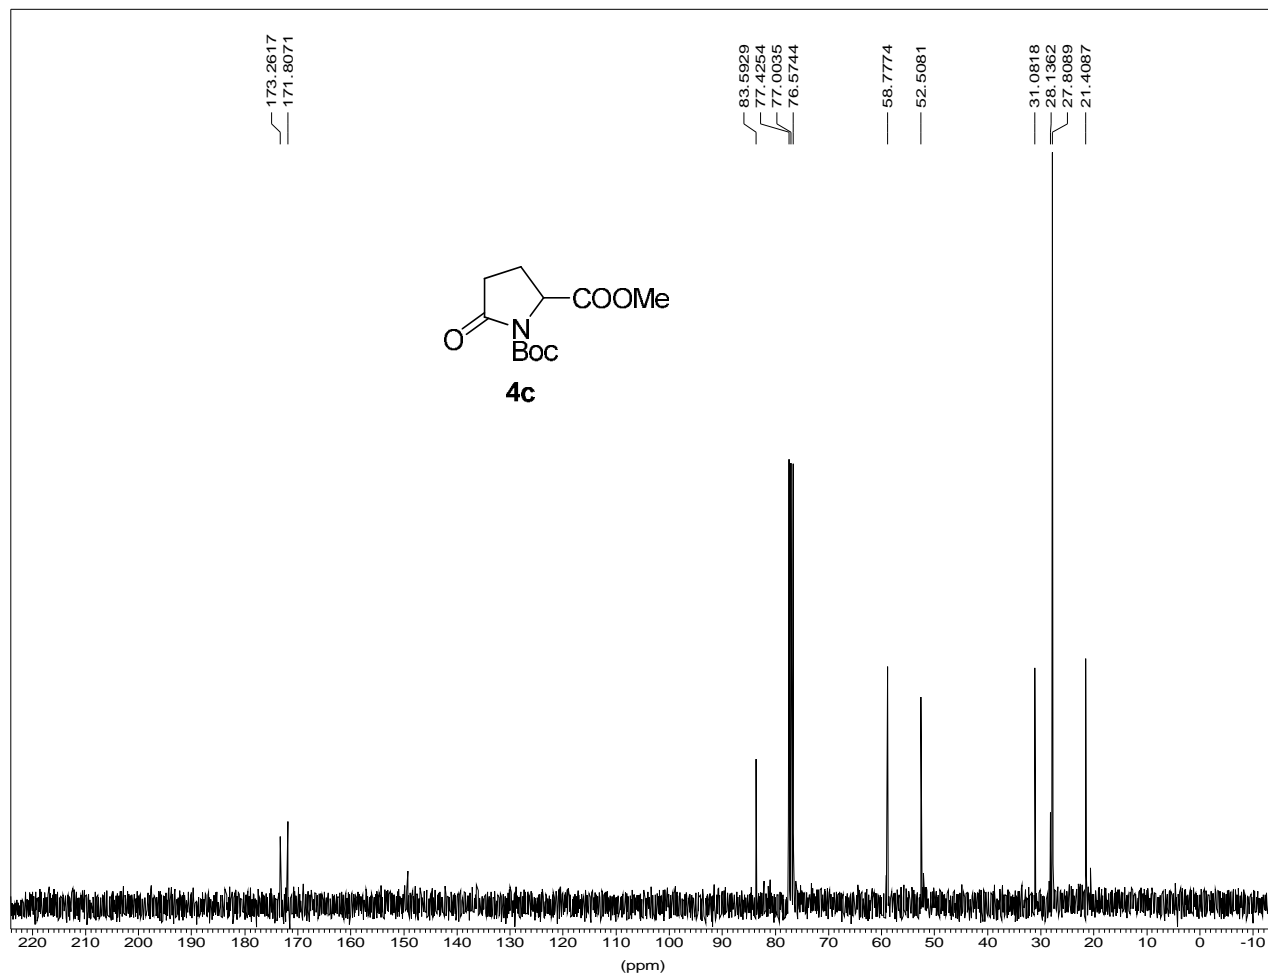

\*\*\* Current Data Parameters \*\*\*

NAME : nv04hwk  
EXPNO : 4  
PROCNO : 1

\*\*\* Acquisition Parameters \*\*\*

BF1 : 75.4677490 MHz  
LOCNUC : 2H  
NS : 223  
O1 : 7924.11 Hz  
PULPROG : zgpg30  
SFO1 : 75.4756731 MHz  
SOLVENT : CDCl3  
SW : 238.2968 ppm

\*\*\* Processing Parameters \*\*\*

LB : 1.00 Hz  
PHC0 : 187.926 degree  
PHC1 : 65.569 degree

1H AMX500

jas-1-171-1

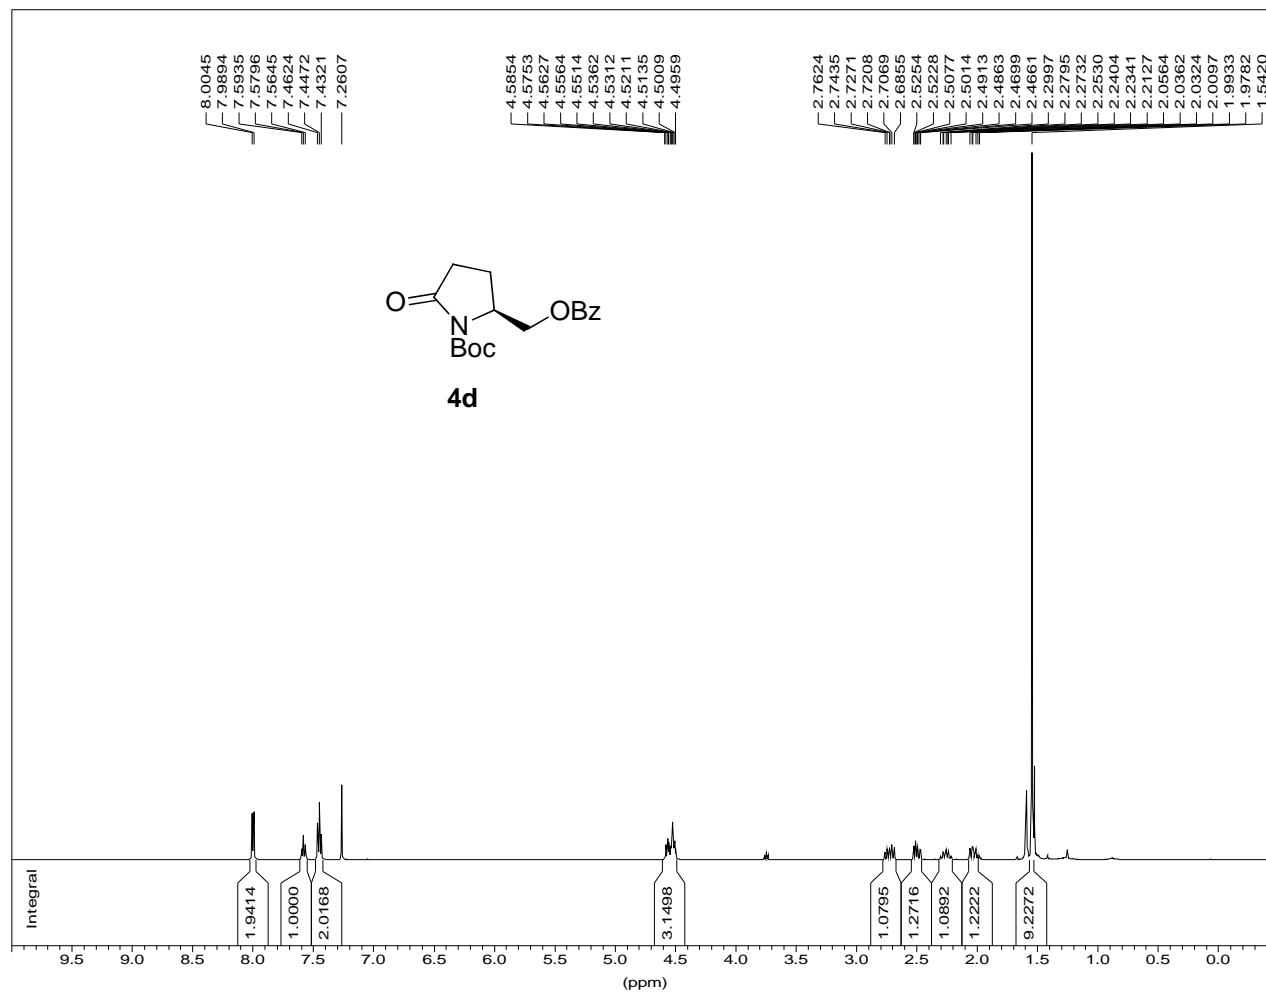

\*\*\* Current Data Parameters \*\*\*

NAME : zfy1221  
EXPNO : 2  
PROCNO : 1

\*\*\* Acquisition Parameters \*\*\*

BF1 : 500.130000 MHz  
LOCNUC : 2H  
NS : 8  
O1 : 3088.51 Hz  
PULPROG : zg30  
SFO1 : 500.133085 MHz  
SOLVENT : CDCl3  
SW : 20.6557 ppm

\*\*\* Processing Parameters \*\*\*

LB : 0.30 Hz  
PHC0 : 60.233 degree  
PHC1 : 1.716 degree

13C AMX500

jas-1-172-1

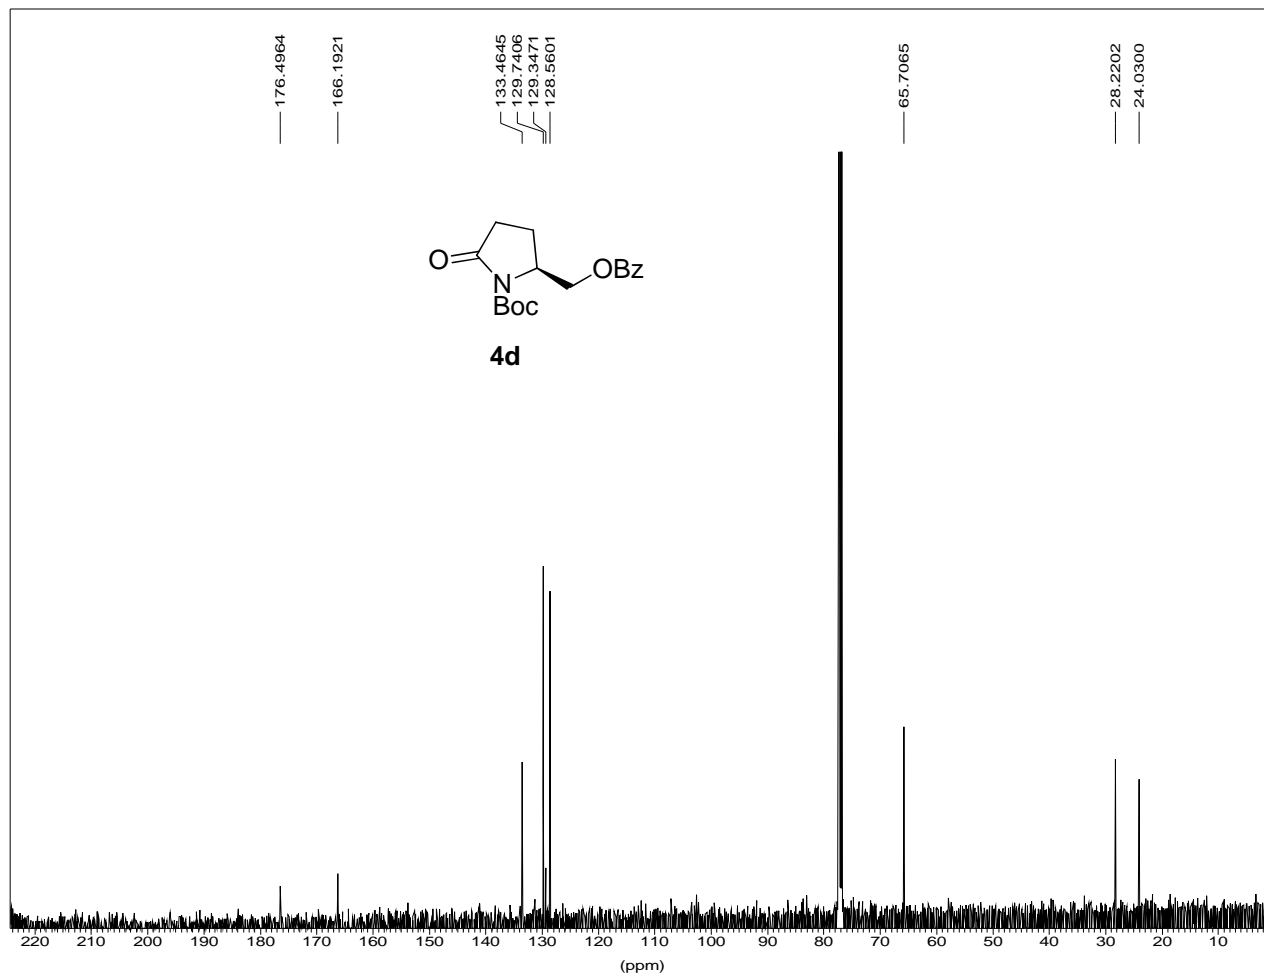

\*\*\* Current Data Parameters \*\*\*

NAME : zfy0111

EXPNO : 1

PROCNO : 1

\*\*\* Acquisition Parameters \*\*\*

BF1 : 125.7577890 MHz

LOCNUC : 2H

NS : 615

O1 : 13204.57 Hz

PULPROG : zgpg30

SFO1 : 125.7709936 MHz

SOLVENT : CDCl3

SW : 238.7675 ppm

\*\*\* Processing Parameters \*\*\*

LB : 1.00 Hz

PHC0 : 167.251 degree

PHC1 : 41.795 degree

1H AMX500

jas-2-12-1

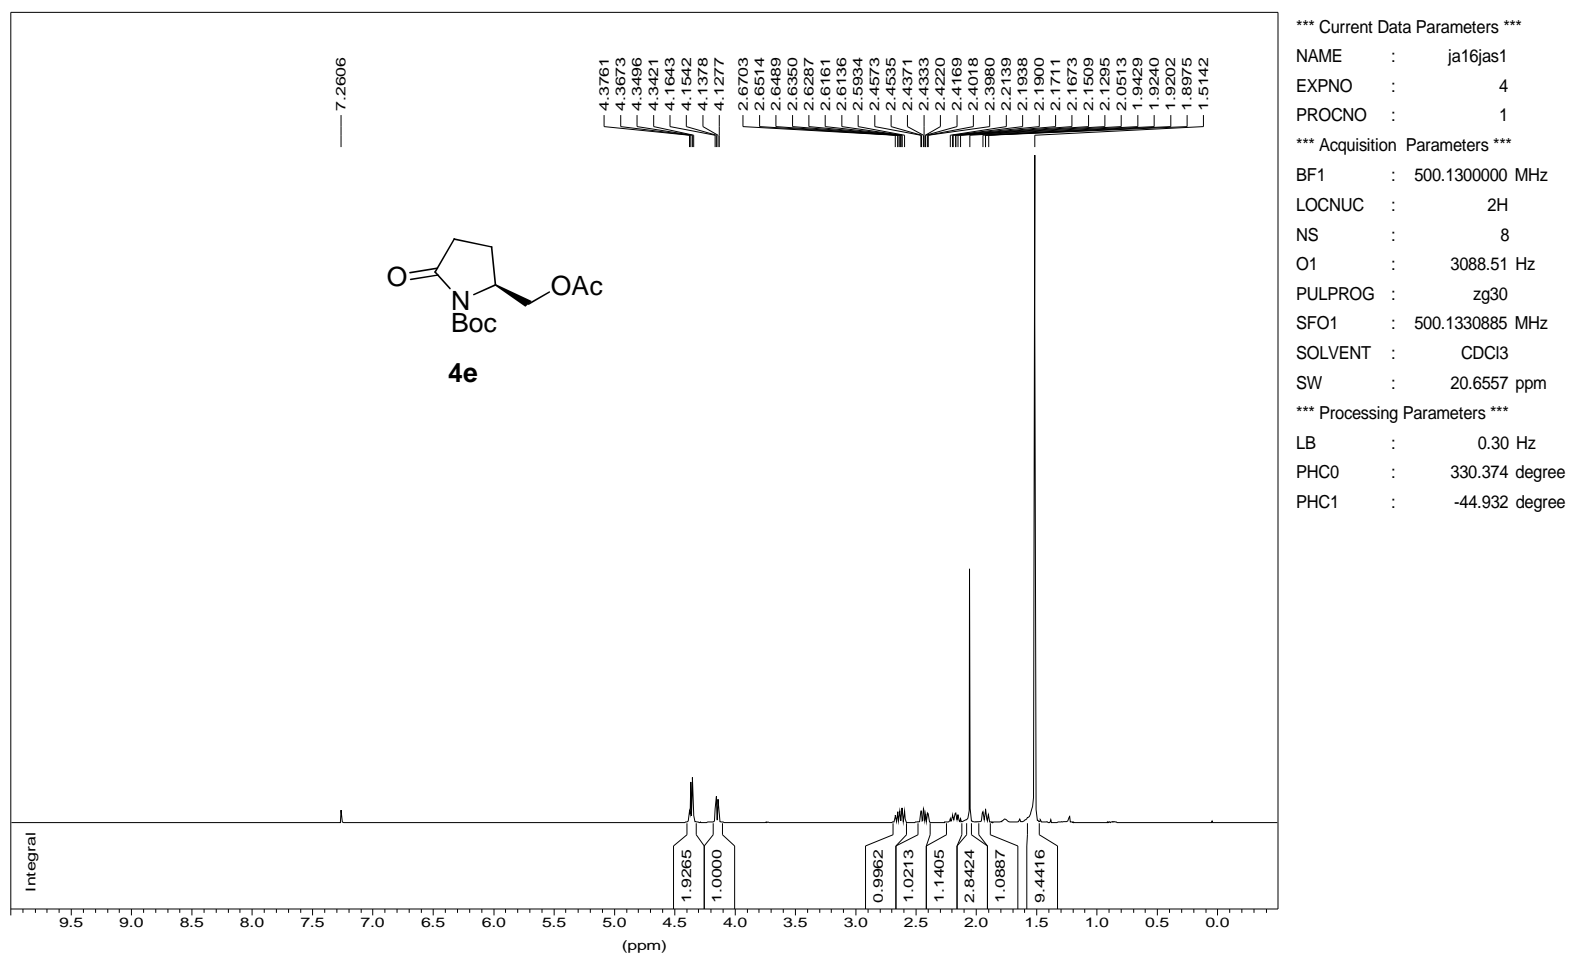

13C AMX500

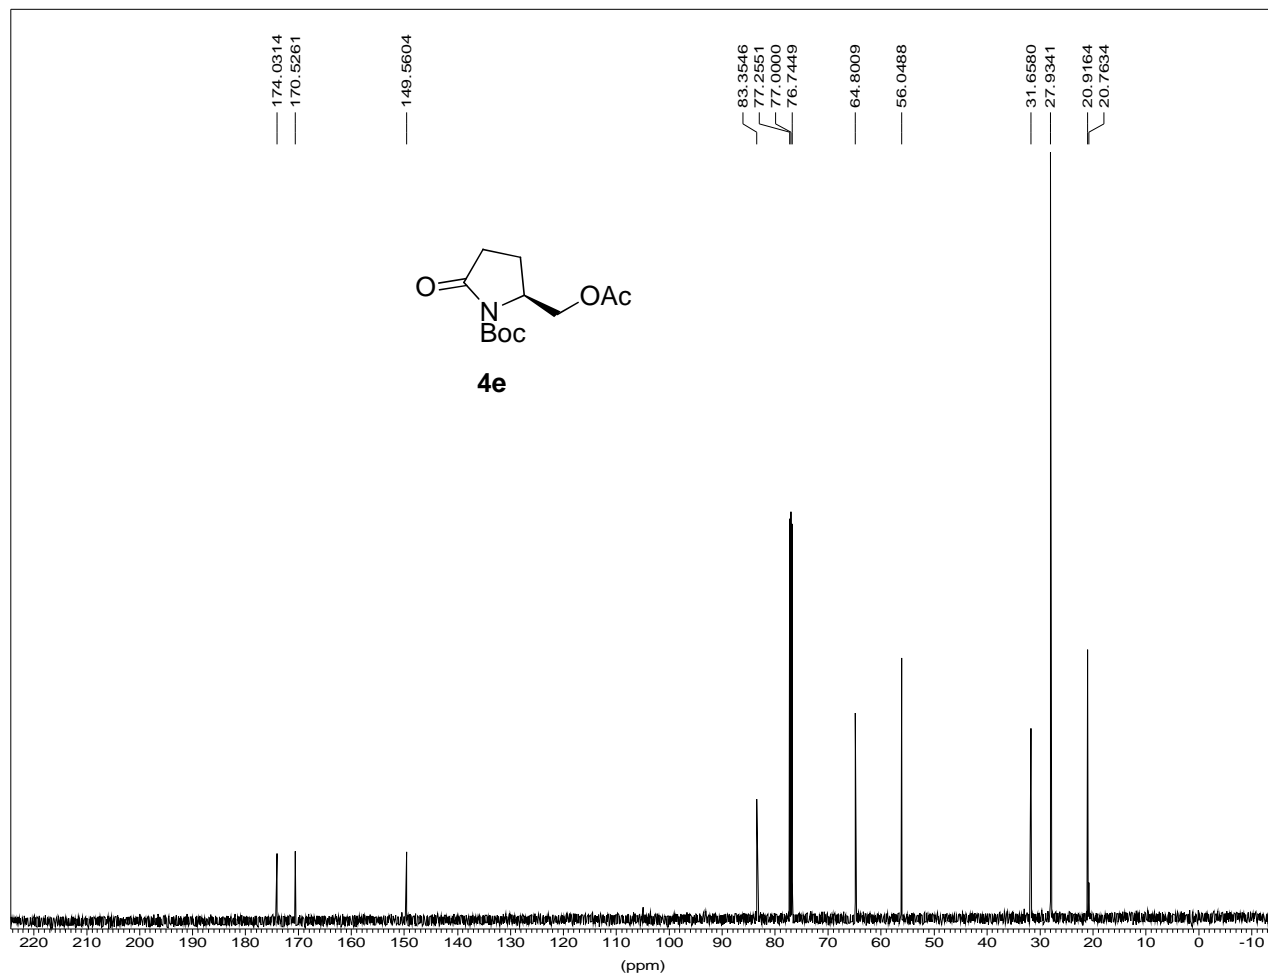

\*\*\* Current Data Parameters \*\*\*

NAME : ja16jas1  
EXPNO : 5  
PROCNO : 1

\*\*\* Acquisition Parameters \*\*\*

BF1 : 125.7577890 MHz  
LOCNUC : 2H  
NS : 121  
O1 : 13204.57 Hz  
PULPROG : zgpg30  
SFO1 : 125.7709936 MHz  
SOLVENT : CDCl3  
SW : 238.7675 ppm

\*\*\* Processing Parameters \*\*\*

LB : 1.00 Hz  
PHC0 : 168.214 degree  
PHC1 : 38.846 degree

1H AMX500  
jas-2-15-1

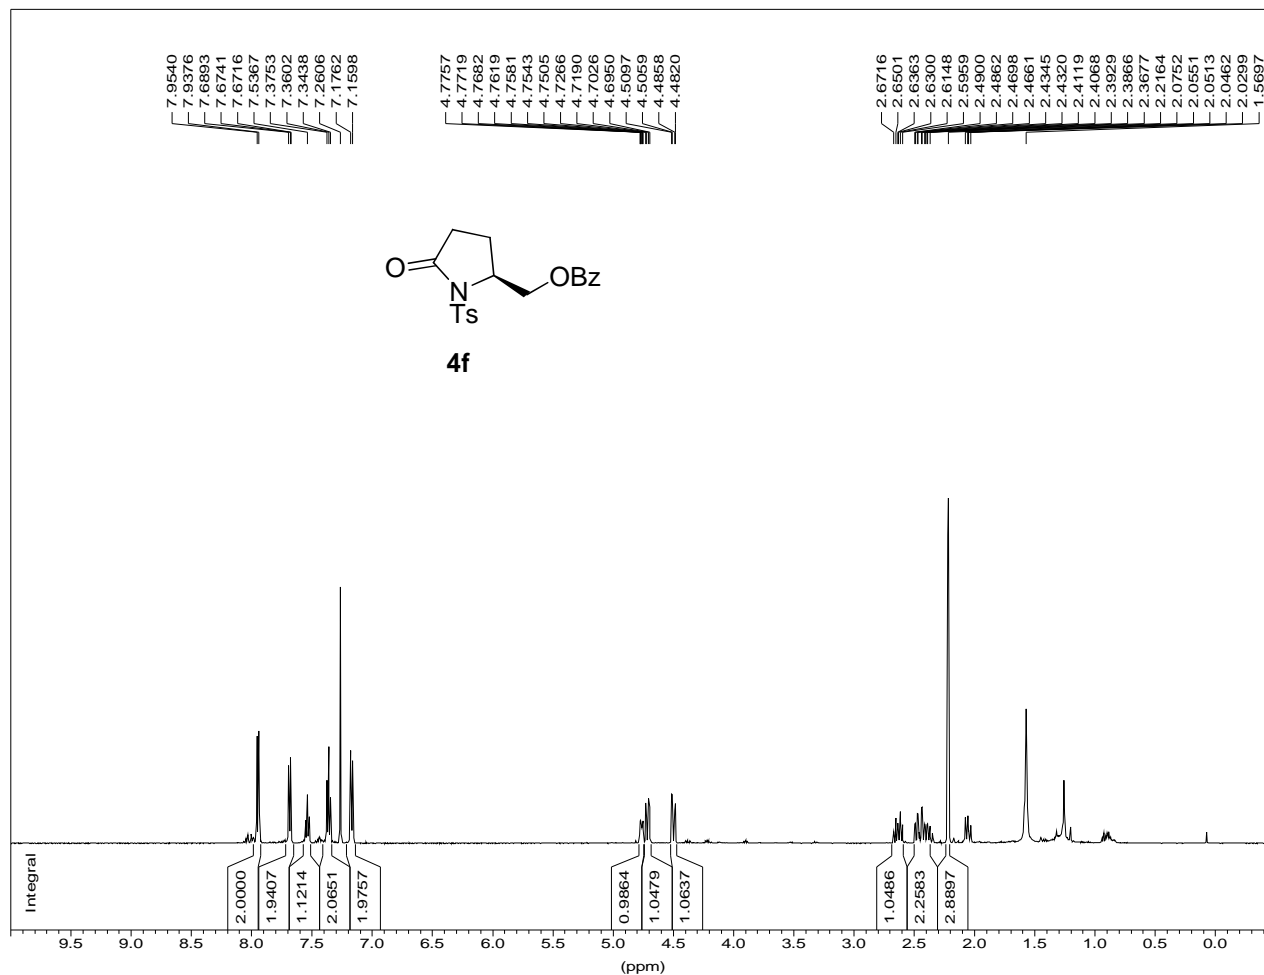

\*\*\* Current Data Parameters \*\*\*

NAME : ja24jas  
EXPNO : 10  
PROCNO : 1

\*\*\* Acquisition Parameters \*\*\*

BF1 : 500.130000 MHz  
LOCNUC : 2H  
NS : 8  
O1 : 3088.51 Hz  
PULPROG : zg30  
SFO1 : 500.1330885 MHz  
SOLVENT : CDCl3  
SW : 20.6557 ppm

\*\*\* Processing Parameters \*\*\*

LB : 0.30 Hz  
PHC0 : 56.776 degree  
PHC1 : 5.475 degree

13C AMX500

jas-2-15-1

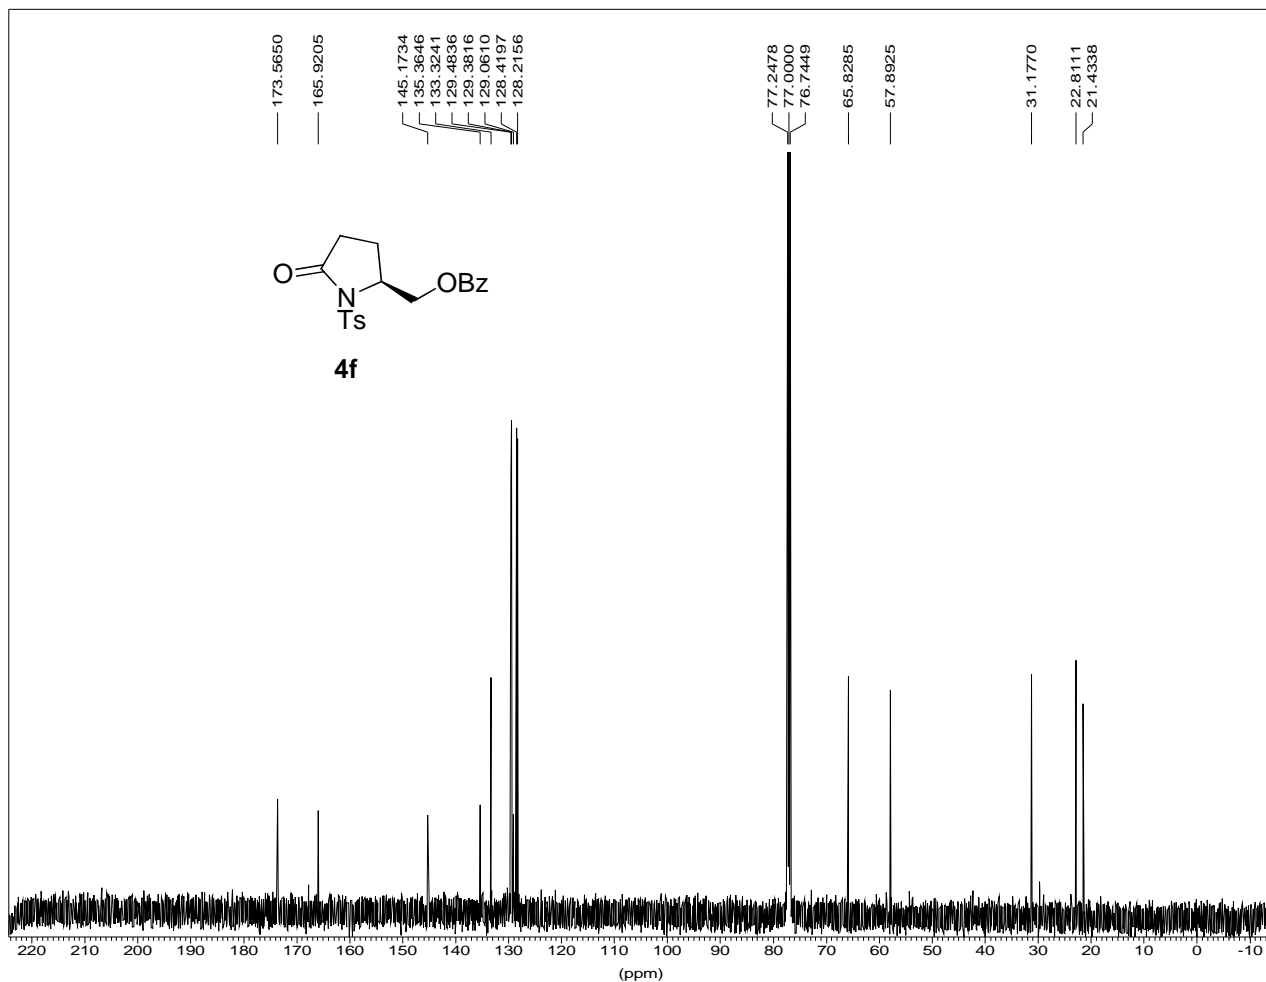

\*\*\* Current Data Parameters \*\*\*

NAME : zfy012-1  
EXPNO : 2  
PROCNO : 1

\*\*\* Acquisition Parameters \*\*\*

BF1 : 125.7577890 MHz  
LOCNUC : 2H  
NS : 985  
O1 : 13204.57 Hz  
PULPROG : zgpg30  
SFO1 : 125.7709936 MHz  
SOLVENT : CDCl3  
SW : 238.7675 ppm

\*\*\* Processing Parameters \*\*\*

LB : 1.00 Hz  
PHC0 : 159.245 degree  
PHC1 : 62.600 degree



1H normal range AC300  
105-16-18

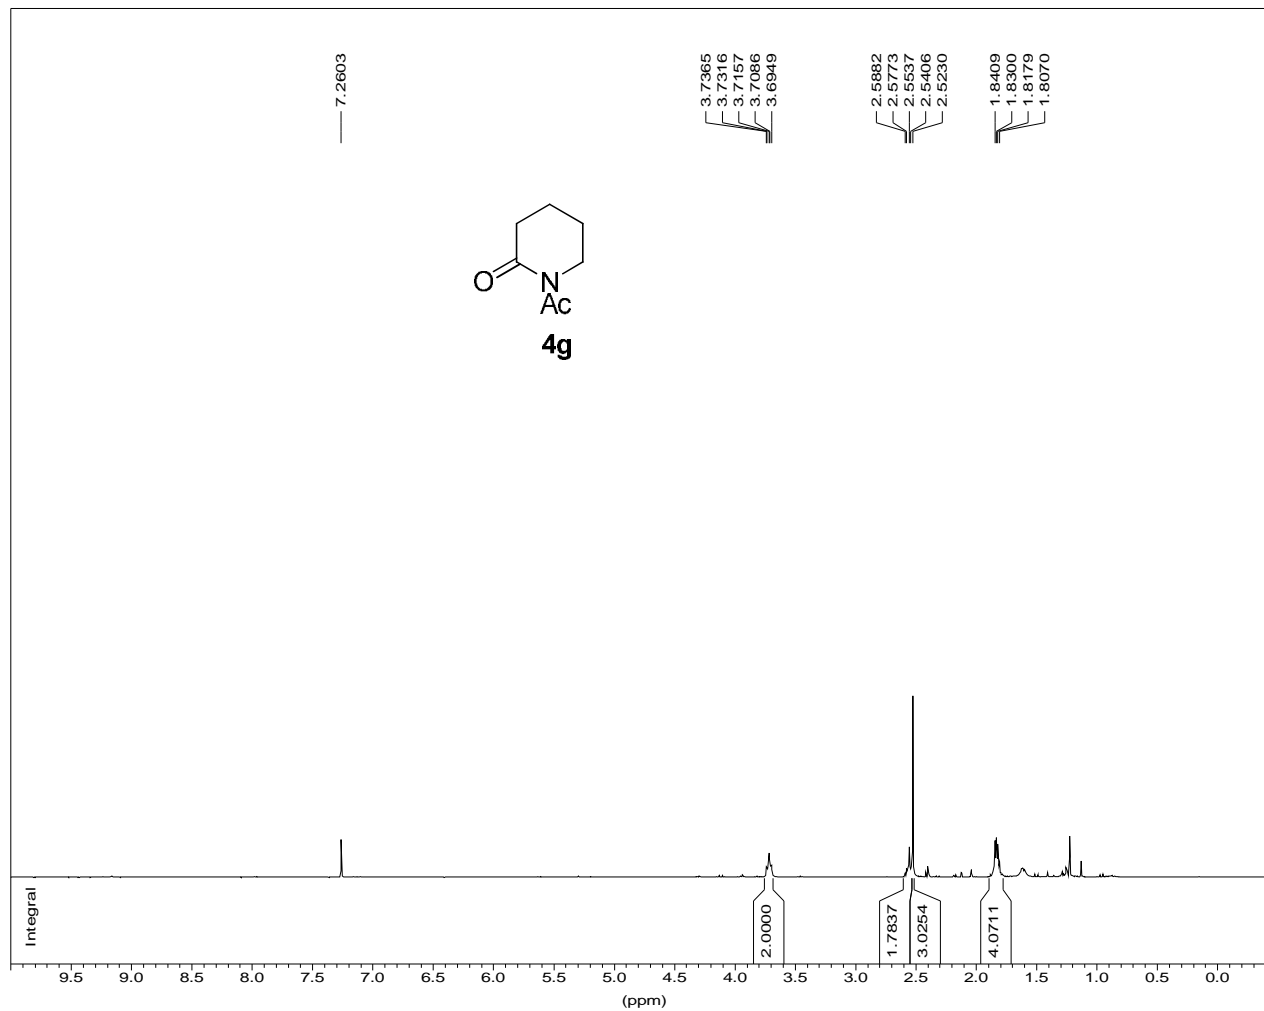

\*\*\* Current Data Parameters \*\*\*

NAME : ja05hwk  
EXPNO : 4  
PROCNO : 1

\*\*\* Acquisition Parameters \*\*\*

BF1 : 300.1300000 MHz  
LOCNUC : 2H  
NS : 8  
O1 : 1853.43 Hz  
PULPROG : zg30  
SFO1 : 300.1318534 MHz  
SOLVENT : CDCl3  
SW : 17.9519 ppm

\*\*\* Processing Parameters \*\*\*

LB : 0.30 Hz  
PHC0 : 311.493 degree  
PHC1 : -0.157 degree

13C Standard AC300

105-16-18

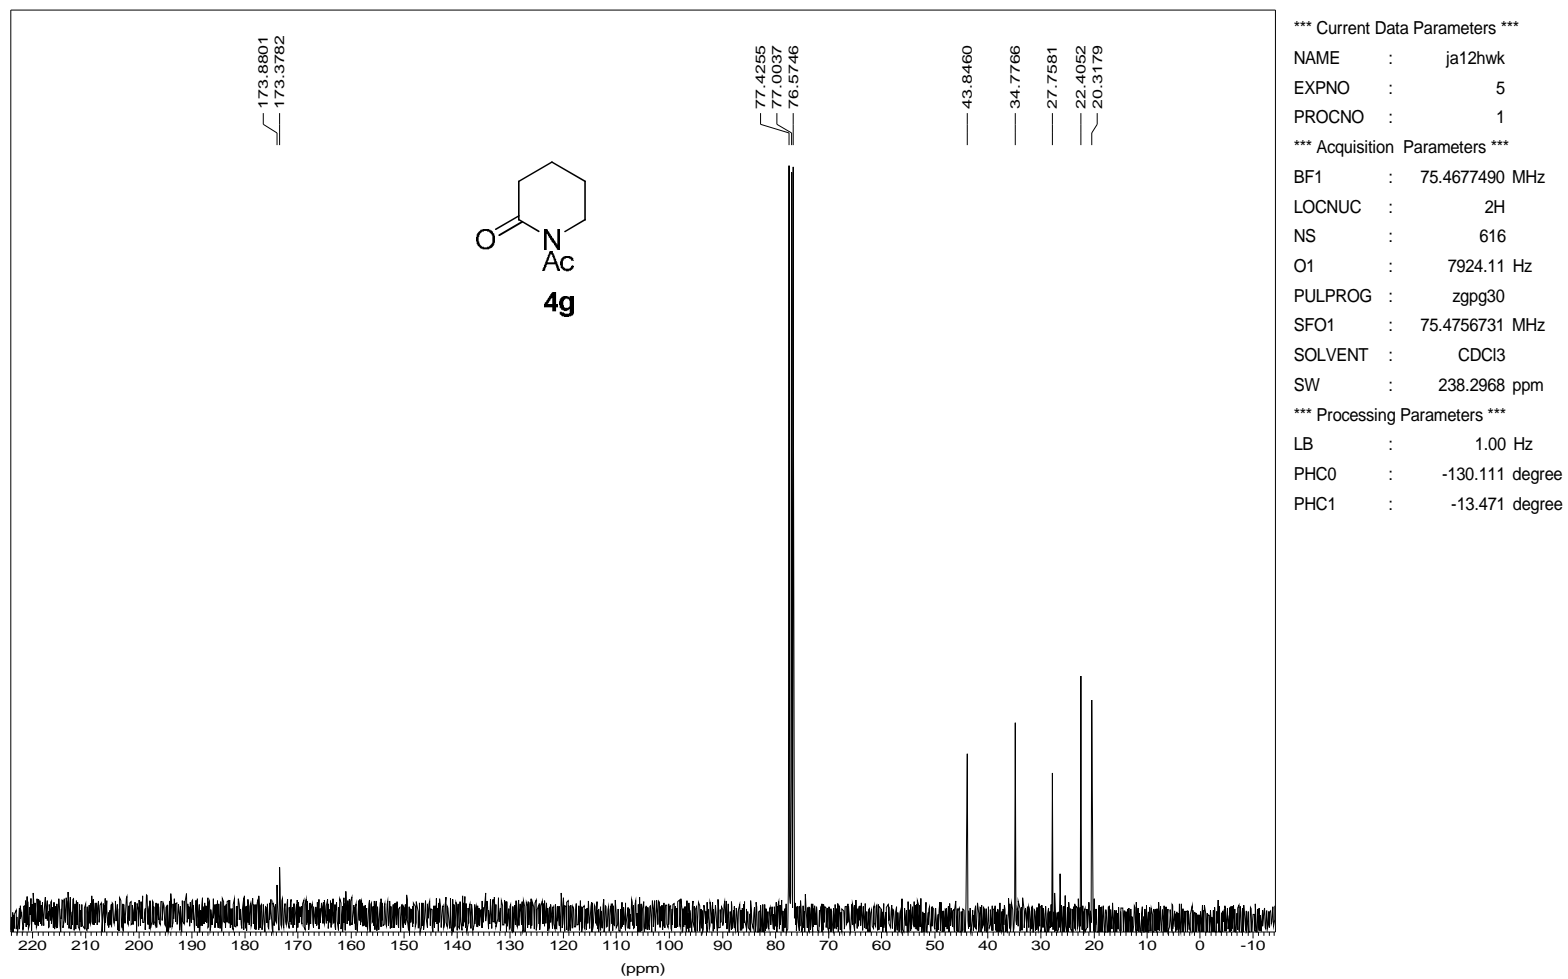

1H normal range AC300

75-12,13

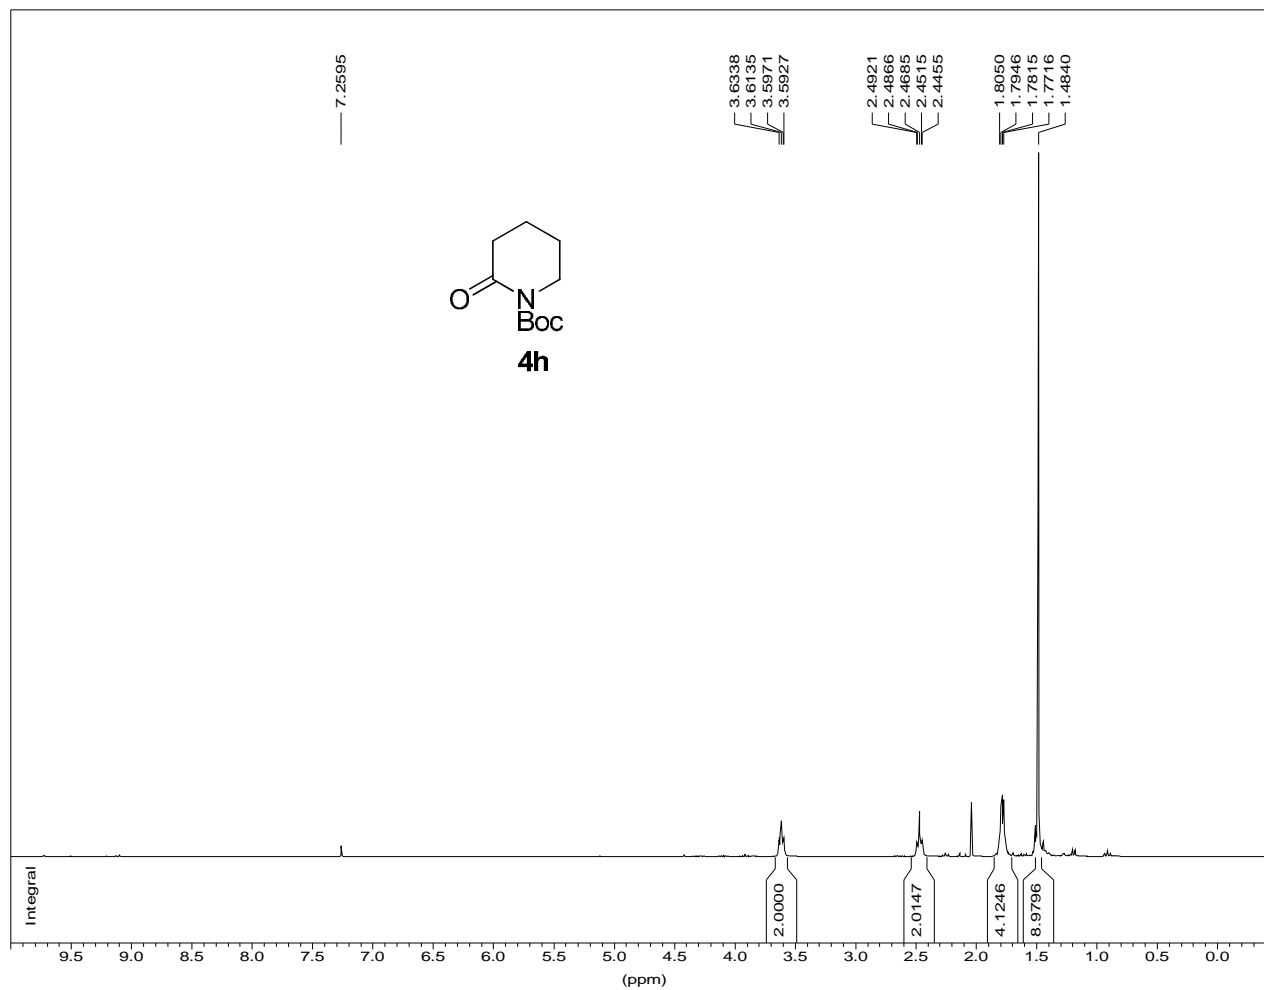

\*\*\* Current Data Parameters \*\*\*

NAME : oc20hwk  
EXPNO : 1  
PROCNO : 1

\*\*\* Acquisition Parameters \*\*\*

BF1 : 300.1300000 MHz  
LOCNUC : 2H  
NS : 8  
O1 : 1853.43 Hz  
PULPROG : zg30  
SFO1 : 300.1318534 MHz  
SOLVENT : CDCl3  
SW : 17.9519 ppm

\*\*\* Processing Parameters \*\*\*

LB : 0.30 Hz  
PHC0 : 167.157 degree  
PHC1 : -8.047 degree

13C Standard AC300

75-12,13

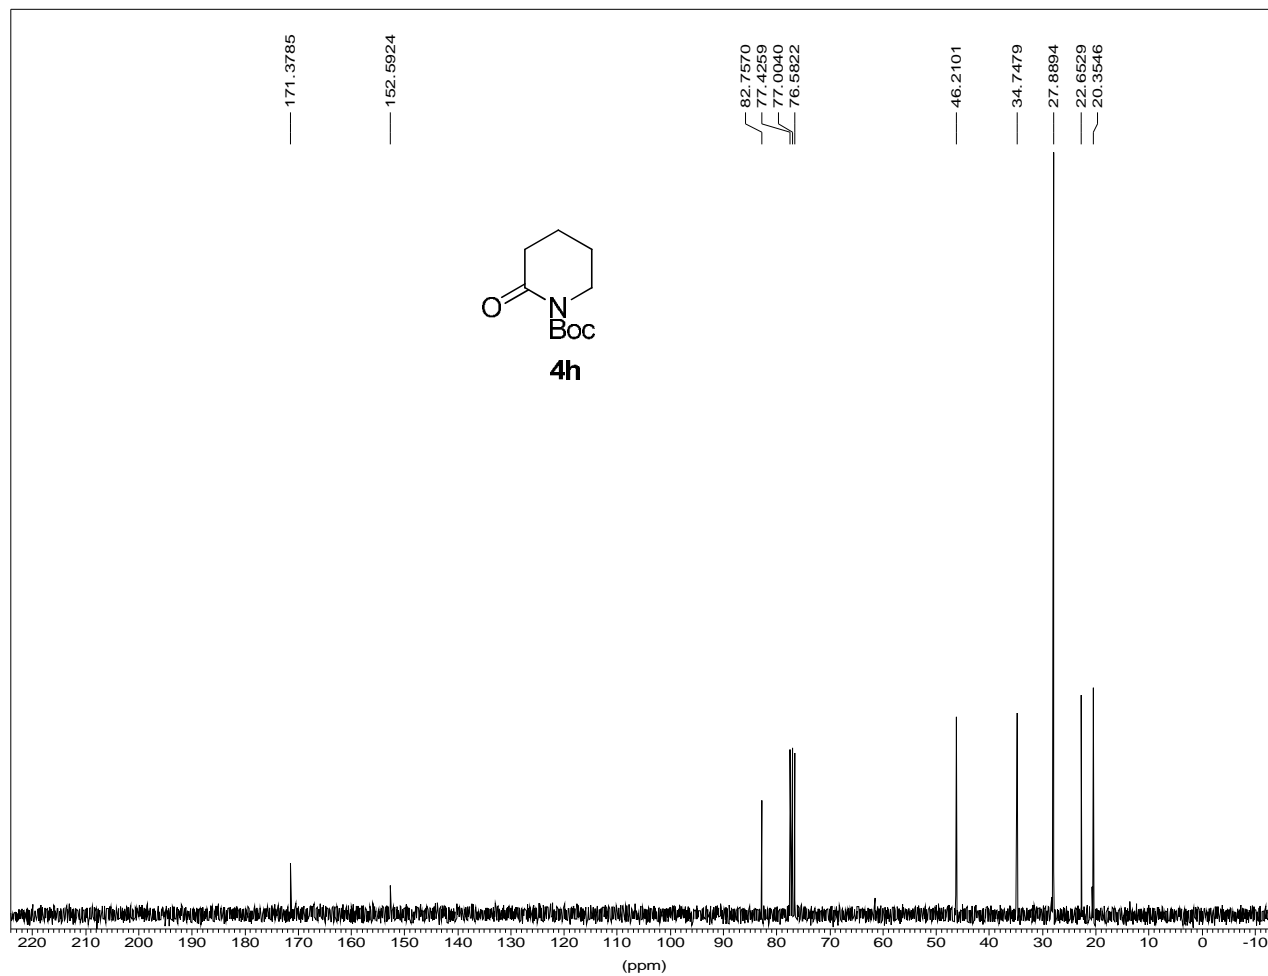

\*\*\* Current Data Parameters \*\*\*

NAME : oc21hwk  
EXPNO : 4  
PROCNO : 1

\*\*\* Acquisition Parameters \*\*\*

BF1 : 75.4677490 MHz  
LOCNUC : 2H  
NS : 101  
O1 : 7924.11 Hz  
PULPROG : zgpg30  
SFO1 : 75.4756731 MHz  
SOLVENT : CDCl3  
SW : 238.2968 ppm

\*\*\* Processing Parameters \*\*\*

LB : 1.00 Hz  
PHC0 : 244.579 degree  
PHC1 : -34.382 degree

1H AMX500  
jas-1-17-2

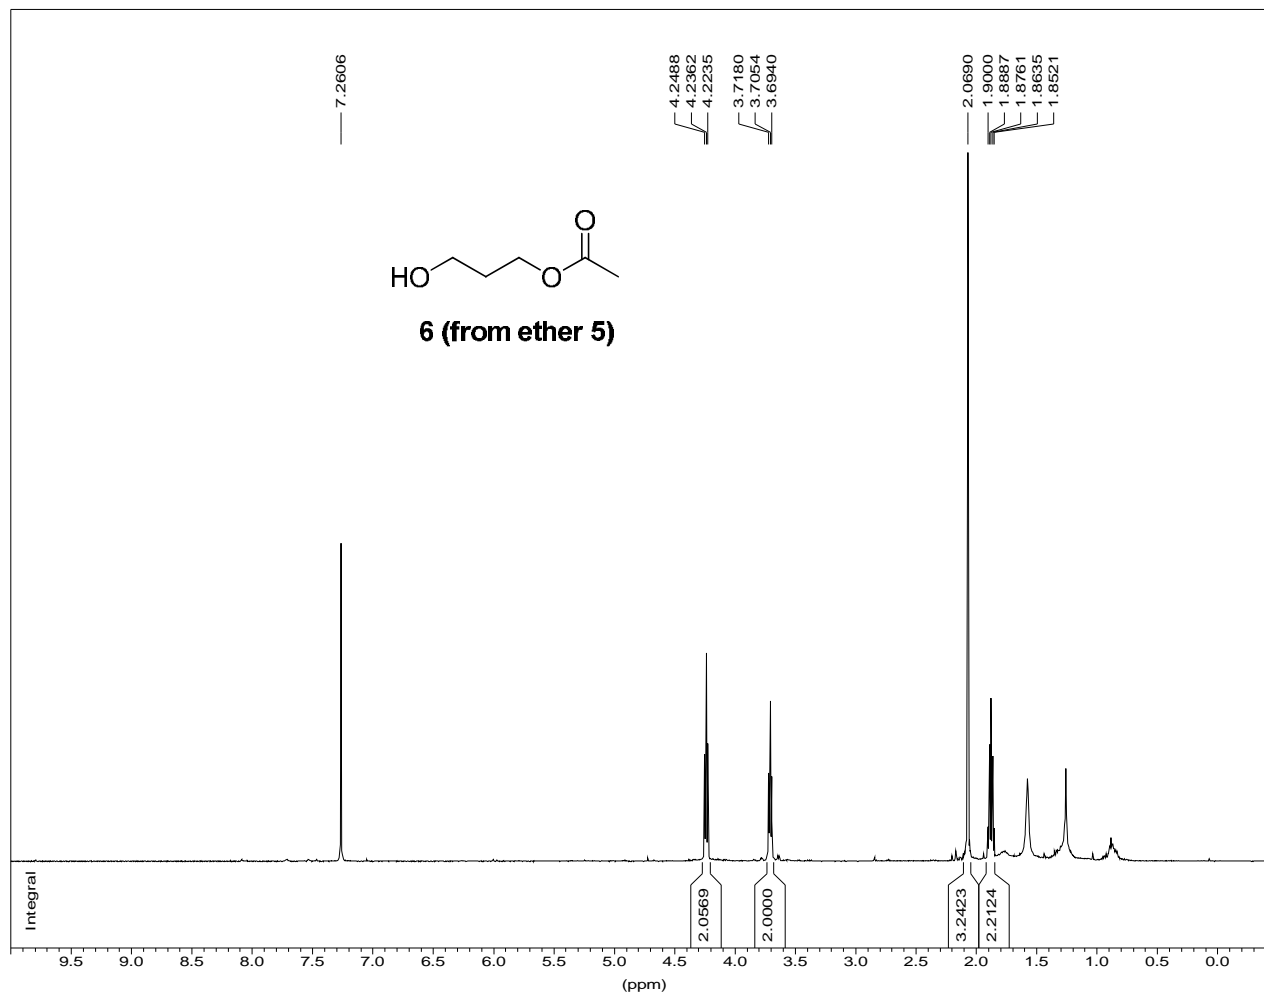

\*\*\* Current Data Parameters \*\*\*

NAME : zfy0730  
EXPNO : 2  
PROCNO : 1

\*\*\* Acquisition Parameters \*\*\*

BF1 : 500.130000 MHz  
LOCNUC : 2H  
NS : 8  
O1 : 3088.51 Hz  
PULPROG : zg30  
SFO1 : 500.1330885 MHz  
SOLVENT : CDCl3  
SW : 20.6557 ppm

\*\*\* Processing Parameters \*\*\*

LB : 0.30 Hz  
PHC0 : 23.993 degree  
PHC1 : 3.174 degree

1H AMX500  
jas-1-28-1

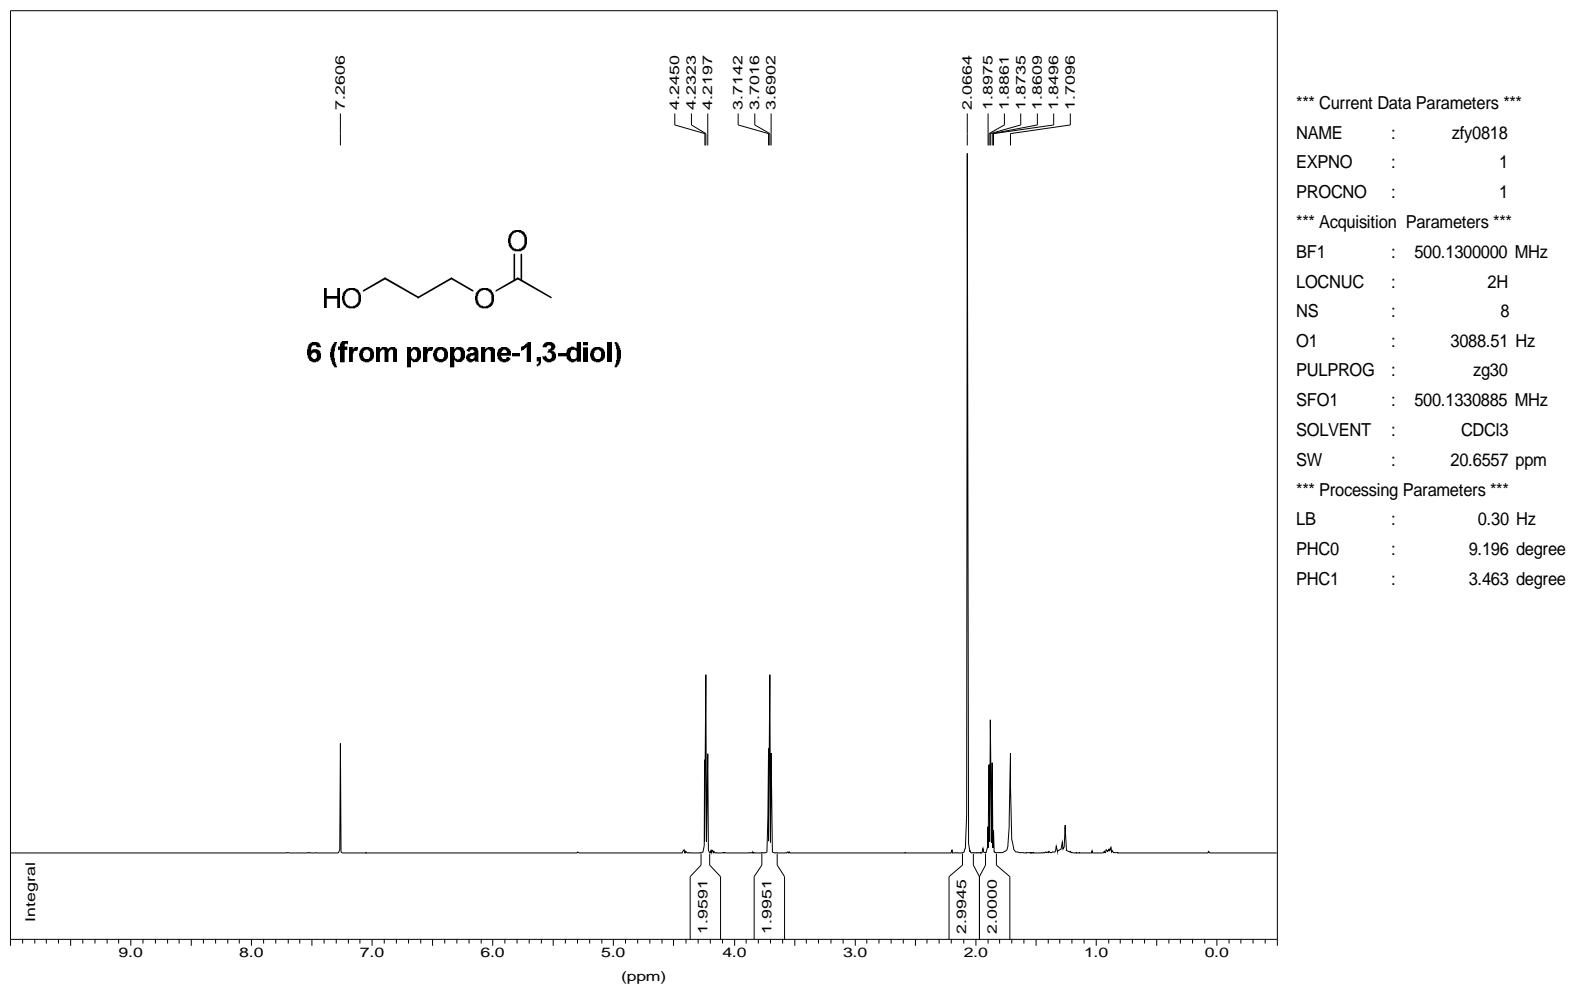

13C AMX500

jas-2-29-1

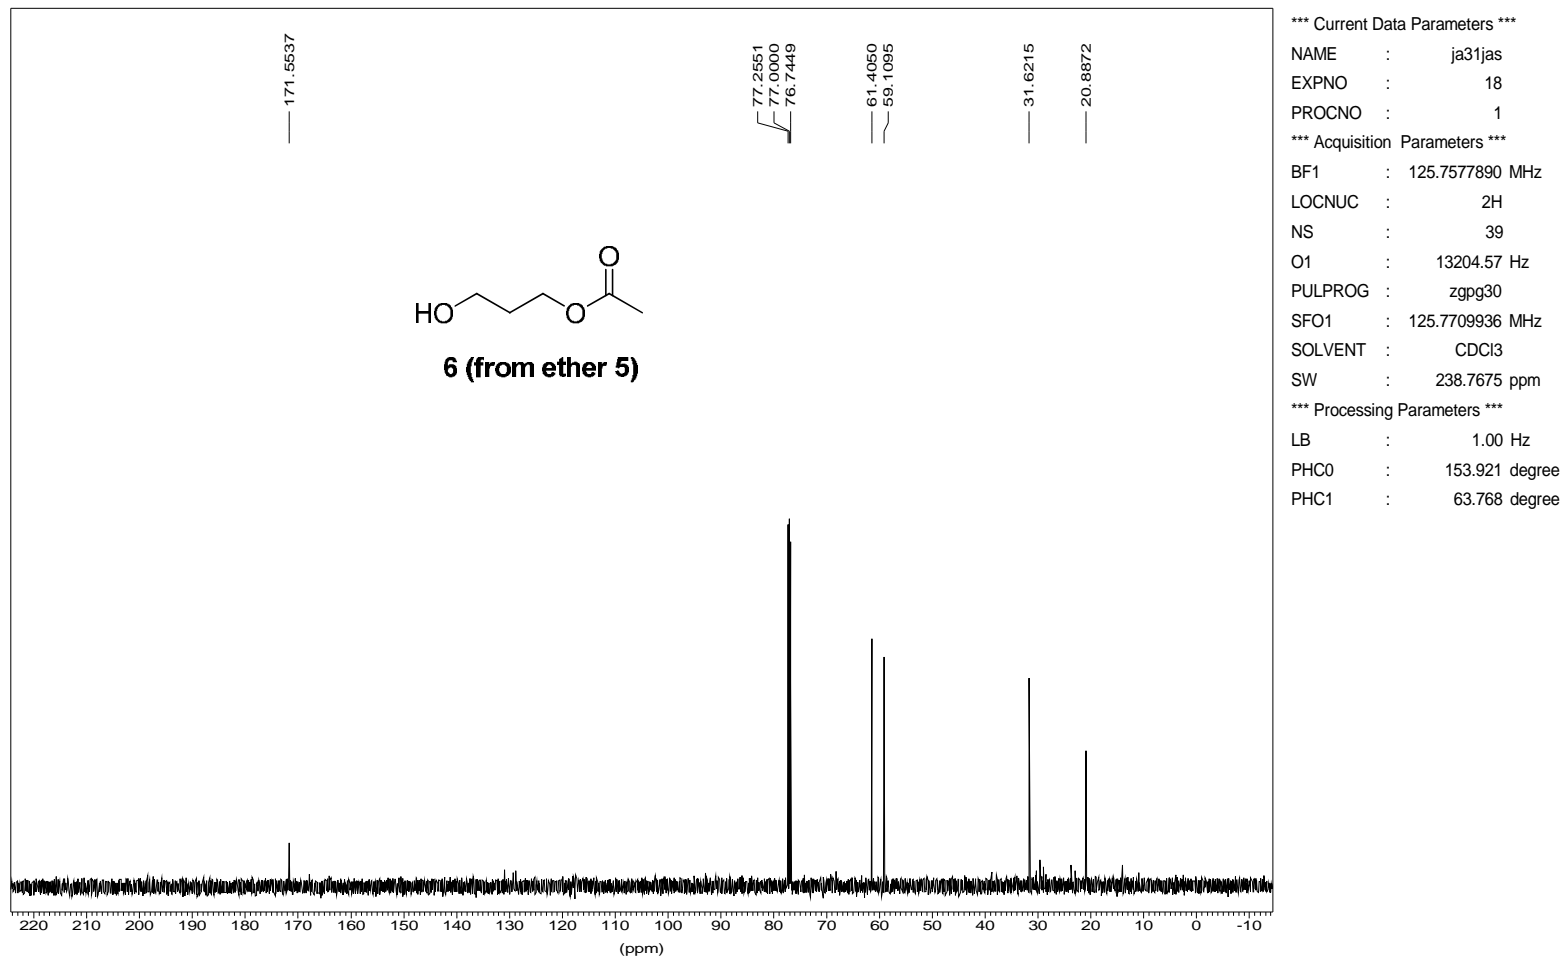

1H AMX500  
jas-2-33-1

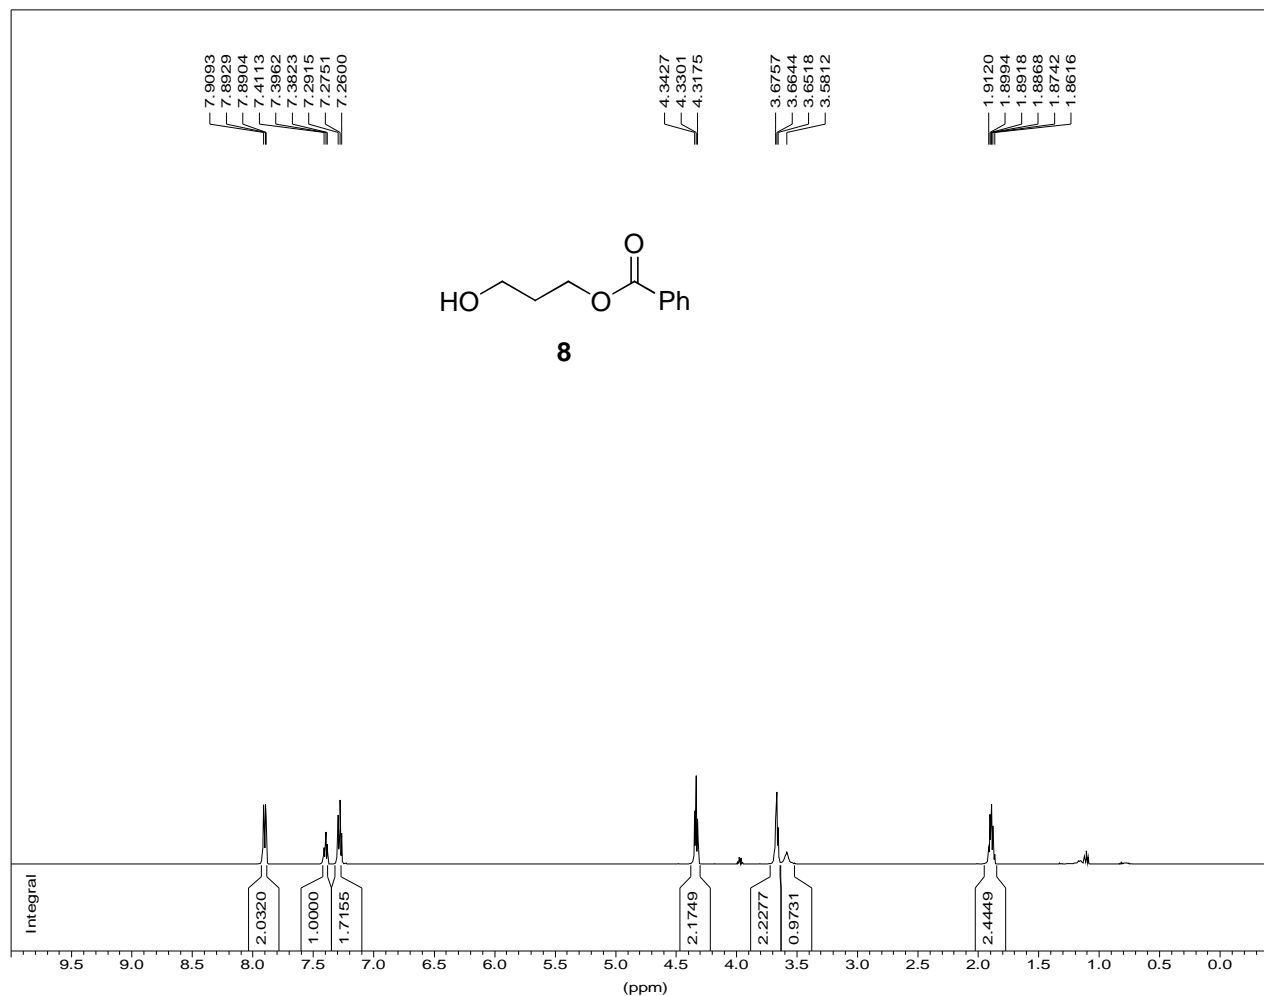

\*\*\* Current Data Parameters \*\*\*

NAME : ja31jas  
EXPNO : 16  
PROCNO : 1

\*\*\* Acquisition Parameters \*\*\*

BF1 : 500.130000 MHz  
LOCNUC : 2H  
NS : 8  
O1 : 3088.51 Hz  
PULPROG : zg30  
SFO1 : 500.1330885 MHz  
SOLVENT : CDCl3  
SW : 20.6557 ppm

\*\*\* Processing Parameters \*\*\*

LB : 0.30 Hz  
PHC0 : 43.097 degree  
PHC1 : -5.521 degree



13C Standard AC300

jas-2-33-1

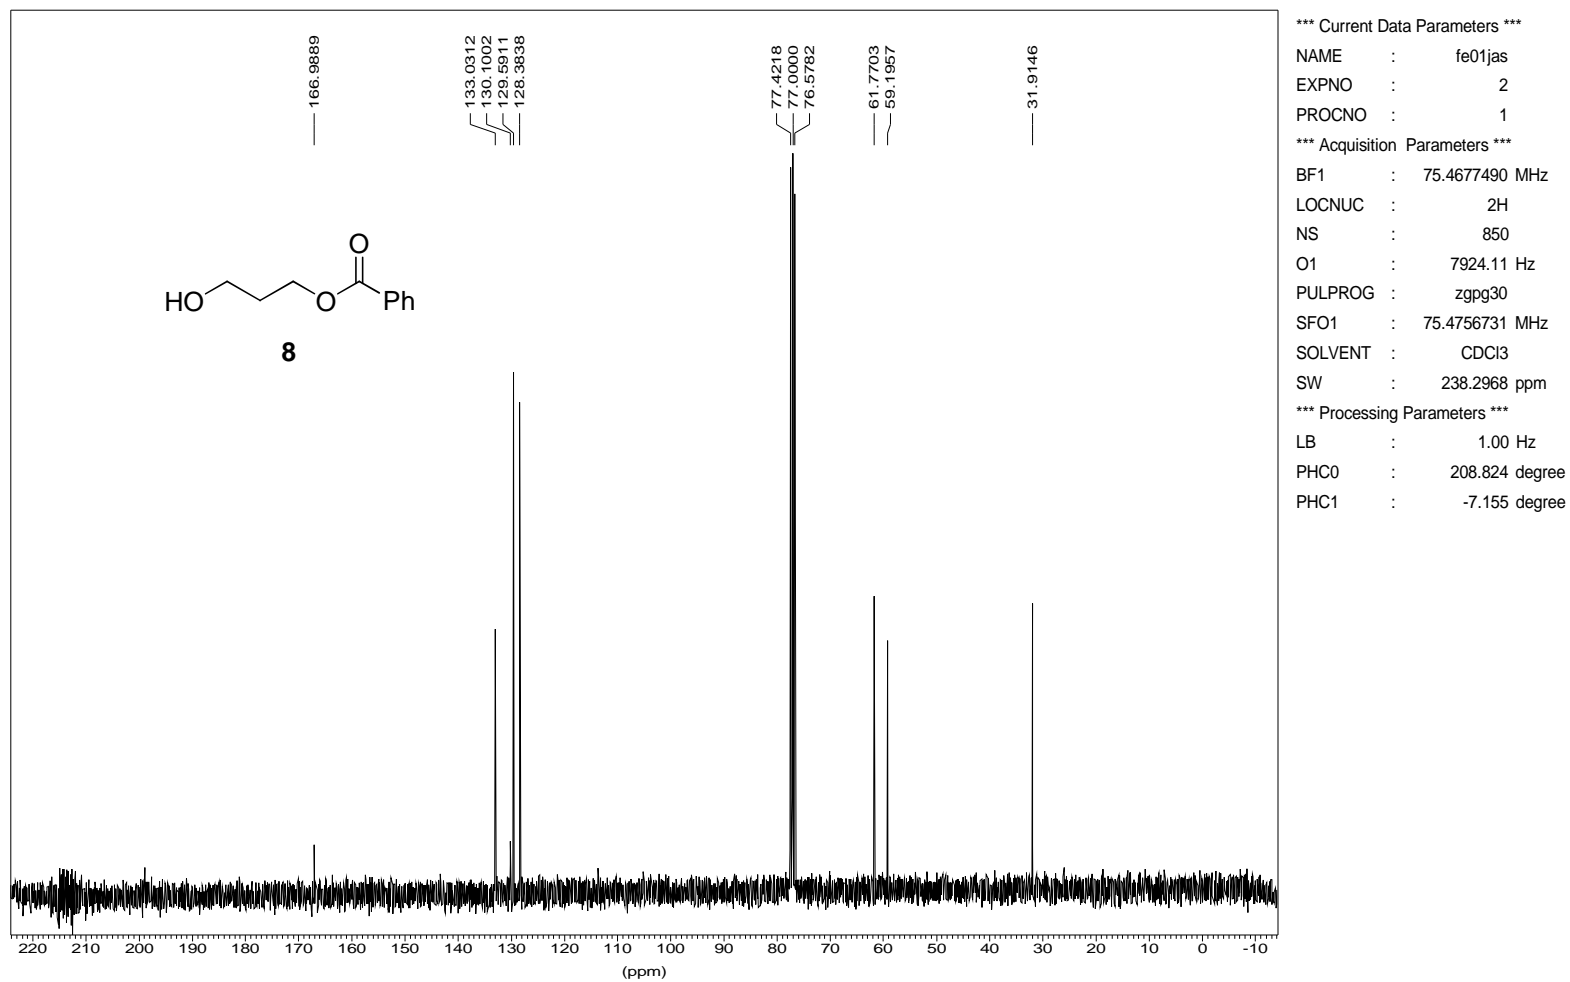

Supplement: c3ra44184a.pdf [file c3ra44184a.pdf]
